# Supplementary material
Source: Royal Society of Chemistry journal article supplement (doi:10.1039/d6cc01245k)

# Supporting Information

## Anti-markovnikov radical hydroxychlorination of alkenes enabled by amine-promoted chlorine radical generation

Renhua Su<sup>a</sup>, Duoduo Xiao<sup>a,\*</sup>, Yanfu Jiang<sup>a</sup>, Xian Jiang, Jiantao Zhang<sup>a,\*</sup>, Yaju Chen<sup>a</sup>,  
and Weibing Liu<sup>a,\*</sup>

<sup>a</sup> College of Chemistry, Guangdong University of Petrochemical Technology, Kechuang Road, Maoming,  
525024, China;

\*Emails: dd.xiao@gdupt.edu.cn, zhangjt@gdupt.edu.cn, lwb409@gdupt.edu.cn.

### Table of contents

|                                                             |   |
|-------------------------------------------------------------|---|
| General Information.....                                    | 2 |
| General Procedures for Products <b>4</b> .....              | 2 |
| References.....                                             | 5 |
| Radical inhibition and trapping experiments .....           | 6 |
| Possible Mechanism for the Synthesis of <b>4</b> .....      | 8 |
| Copies of <sup>1</sup> H, <sup>13</sup> C NMR spectra ..... | 9 |

## General Information.

Unless otherwise stated, all reagents were used as received from commercial sources and used without purification. All reactions (for the synthesis of **4**) were carried out at 60 °C (oil bath) in a round-bottom flask equipped with a magnetic stir bar. <sup>1</sup>H, <sup>13</sup>C NMR spectra were recorded on a Bruker AVANCE (400 MHz for <sup>1</sup>H; 101 MHz for <sup>13</sup>C) in CDCl<sub>3</sub> with tetramethylsilane as the internal standard. Chemical shifts (δ) are reported in ppm, and coupling constants (*J*) are in Hertz (Hz). Mass spectra were obtained from high resolution *ESI* mass spectrometer. The following abbreviations were used to explain the multiplicities: s = singlet, d = doublet, t = triplet, q = quartet, m = multiplet. HR-MS were obtained on a quadrupole time-off light (Q-TOF) micro spectrometer.

## General Procedures for Products 4

To a solution of **1** (0.5 mmol, 1.0 equiv.) in 1,1,2,2-tetrachloroethane (**2a**, 0.5 mL) was added TBHP (5.5 M in decane, 3.0 mmol, 6.0 equiv.), HNEt<sub>2</sub> (0.5 mmol, 1.0 equiv.), TMSCN (2.0 mmol, 4.0 equiv.) and CH<sub>3</sub>CN at room temperature in a N<sub>2</sub> atmosphere. Then the solution mixture was stirred at 60 °C for 24 h, after completion of the reaction, the solvent was removed under reduced pressure and the crude product was subjected to silica gel column chromatography to afford **4**.

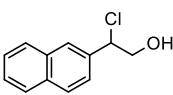 **4a<sup>1</sup>**, yield (65%), yellow oil; R<sub>f</sub> = 0.36 (EtOAc/cyclohexane = 1/10). <sup>1</sup>H NMR (400 MHz, CDCl<sub>3</sub>) δ 7.98 – 7.76 (m, 4H), 7.54 (dd, *J* = 6.3, 3.1 Hz, 3H), 5.27 – 5.12 (m, 1H), 4.16 – 3.98 (m, 2H), 2.15 (s, 1H). <sup>13</sup>C NMR (101 MHz, CDCl<sub>3</sub>) δ 135.1, 133.4, 133.0, 128.9, 128.1, 127.8, 127.0, 126.74, 126.66, 124.7, 67.8, 65.0. HRMS (*ESI*) *m/z*: [M+H]<sup>+</sup> Calcd for C<sub>12</sub>H<sub>11</sub>ClONa<sup>+</sup> 229.0391; Found 229.0384.

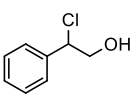 **4b<sup>1</sup>**, yield (68%), yellow oil; R<sub>f</sub> = 0.35 (EtOAc/cyclohexane = 1/10). <sup>1</sup>H NMR (400 MHz, CDCl<sub>3</sub>) δ 7.49 – 7.32 (m, 5H), 5.02 (dd, *J* = 7.4, 5.7 Hz, 1H), 4.03 – 3.87 (m, 2H), 2.23 (s, 1H). <sup>13</sup>C NMR (101 MHz, CDCl<sub>3</sub>) δ 137.8, 128.9, 128.8, 127.5, 67.9, 64.9.

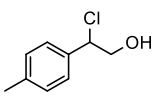 **4c<sup>1</sup>**, yield (70%), yellow oil; R<sub>f</sub> = 0.36 (EtOAc/cyclohexane = 1/10). <sup>1</sup>H NMR (400 MHz, CDCl<sub>3</sub>) δ 7.63 – 7.42 (m, 1H), 7.30 – 7.24 (m, 2H), 7.22 (dd, *J* = 9.9, 4.3 Hz, 1H), 5.31 (dd, *J* = 8.1, 5.0 Hz, 1H), 4.00 (qd, *J* = 12.1, 6.6 Hz, 2H), 2.44 (s, 3H). <sup>13</sup>C NMR (101 MHz, CDCl<sub>3</sub>) δ 135.9, 130.8, 128.7, 126.7, 67.0, 61.3, 19.2.

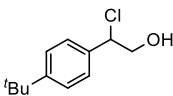 **4d<sup>1</sup>**, yield (72%), yellow oil; R<sub>f</sub> = 0.38 (EtOAc/cyclohexane = 1/10). <sup>1</sup>H NMR (400 MHz, CDCl<sub>3</sub>) δ 7.48 – 7.40 (m, 2H), 7.36 (d, *J* = 8.4 Hz, 2H), 5.01 (dd, *J* = 7.5, 5.6 Hz, 1H), 4.00 – 3.88 (m, 2H), 2.34 (s, 1H), 1.35 (s, 9H). <sup>13</sup>C NMR (101 MHz, CDCl<sub>3</sub>) δ 152.0, 134.8, 127.2, 125.8, 67.8, 64.8, 34.7, 31.3. HRMS (*ESI*) *m/z*: [M+Na]<sup>+</sup> Calcd for C<sub>12</sub>H<sub>17</sub>ClONa<sup>+</sup> 235.0860; Found 235.0857.

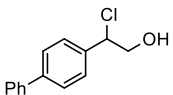 **4e**, yield (67%), yellow oil; R<sub>f</sub> = 0.37 (EtOAc/cyclohexane = 1/10). <sup>1</sup>H NMR (400 MHz, CDCl<sub>3</sub>) δ 7.65 – 7.59 (m, 4H), 7.51 (dd, *J* = 8.5, 2.0 Hz, 2H), 7.49 – 7.44 (m, 2H), 7.40 (ddd, *J* = 7.4, 3.8, 1.2 Hz, 1H), 5.08 (dd, *J* = 7.3, 5.7 Hz, 1H), 4.12 – 3.92 (m, 2H), 2.20 (s, 1H). <sup>13</sup>C NMR (101 MHz, CDCl<sub>3</sub>) δ 141.9, 140.4, 136.8, 128.9, 127.9, 127.7, 127.6, 127.1, 67.9, 64.7. HRMS (*ESI*) *m/z*: [M+Na]<sup>+</sup> Calcd for C<sub>14</sub>H<sub>13</sub>ClNaO<sup>+</sup> 255.0547; Found 255.0552.

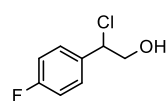

**4f**, yield (62%), yellow oil;  $R_f = 0.35$  (EtOAc/cyclohexane = 1/10).  $^1\text{H NMR}$  (400 MHz,  $\text{CDCl}_3$ )  $\delta$  7.49 – 7.36 (m, 2H), 7.16 – 7.00 (m, 2H), 5.00 (dd,  $J = 7.3, 5.6$  Hz, 1H), 4.00 – 3.83 (m, 2H), 2.08 (s, 1H).  $^{13}\text{C NMR}$  (101 MHz,  $\text{CDCl}_3$ )  $\delta$  162.8 (d,  $J = 248.2$  Hz), 133.8 (d,  $J = 3.4$  Hz), 129.3 (d,  $J = 8.4$  Hz), 115.8 (d,  $J = 21.7$  Hz), 67.8, 64.0.  $^{19}\text{F NMR}$  (376 MHz,  $\text{CDCl}_3$ )  $\delta$  -112.56. HRMS (*ESI*)  $m/z$ :  $[\text{M}+\text{H}]^+$  Calcd for  $\text{C}_8\text{H}_9\text{ClFO}^+$  175.0320; Found 175.0316.

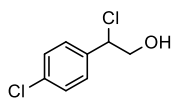

**4g**<sup>1</sup>, yield (64%), yellow oil;  $R_f = 0.35$  (EtOAc/cyclohexane = 1/10).  $^1\text{H NMR}$  (400 MHz,  $\text{CDCl}_3$ )  $\delta$  7.53 – 7.27 (m, 4H), 5.07 – 4.83 (m, 1H), 3.93 (dd,  $J = 5.4, 1.8$  Hz, 2H), 2.23 (s, 1H).  $^{13}\text{C NMR}$  (101 MHz,  $\text{CDCl}_3$ )  $\delta$  136.4, 134.8, 129.0, 128.9, 67.7, 63.9. HRMS (*ESI*)  $m/z$ :  $[\text{M}+\text{H}]^+$  Calcd for  $\text{C}_8\text{H}_9\text{Cl}_2\text{O}^+$  191.0025; Found 191.0016.

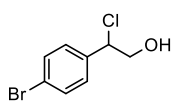

**4h**<sup>1</sup>, yield (60%), yellow oil;  $R_f = 0.35$  (EtOAc/cyclohexane = 1/10).  $^1\text{H NMR}$  (400 MHz,  $\text{CDCl}_3$ )  $\delta$  7.63 – 7.46 (m, 2H), 7.33 – 7.19 (m, 2H), 5.03 – 4.87 (m, 1H), 4.01 – 3.82 (m, 2H), 2.18 (s, 1H).  $^{13}\text{C NMR}$  (101 MHz,  $\text{CDCl}_3$ )  $\delta$  136.9, 132.0, 129.2, 122.9, 67.7, 63.9. HRMS (*ESI*)  $m/z$ :  $[\text{M}+\text{H}]^+$  Calcd for  $\text{C}_8\text{H}_9\text{ClBrO}^+$  234.9520; Found 234.9515.

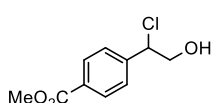

**4i**, yield (53%), yellow oil;  $R_f = 0.32$  (EtOAc/cyclohexane = 1/8).  $^1\text{H NMR}$  (400 MHz,  $\text{CDCl}_3$ )  $\delta$  8.15 – 8.02 (m, 2H), 7.59 – 7.43 (m, 2H), 5.09 – 4.97 (m, 1H), 4.00 – 3.95 (m, 2H), 3.95 (s, 3H), 2.23 (t,  $J = 6.8$  Hz, 1H).  $^{13}\text{C NMR}$  (101 MHz,  $\text{CDCl}_3$ )  $\delta$  166.5, 142.7, 130.6, 130.0, 127.6, 126.1, 67.7, 63.9, 52.3. HRMS (*ESI*)  $m/z$ :  $[\text{M}+\text{H}]^+$  Calcd for  $\text{C}_{10}\text{H}_{12}\text{ClO}_3^+$  215.0469; Found 215.0459.

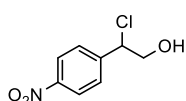

**4j**, yield (39%), yellow oil;  $R_f = 0.37$  (EtOAc/cyclohexane = 1/5).  $^1\text{H NMR}$  (400 MHz,  $\text{CDCl}_3$ )  $\delta$  8.26 (d,  $J = 8.7$  Hz, 2H), 7.64 (d,  $J = 8.7$  Hz, 2H), 5.08 (t,  $J = 6.2$  Hz, 1H), 4.00 (d,  $J = 6.2$  Hz, 2H), 2.30 (s, 1H).  $^{13}\text{C NMR}$  (101 MHz,  $\text{CDCl}_3$ )  $\delta$  145.0, 131.3, 128.6, 124.0, 67.5, 62.8. HRMS (*ESI*)  $m/z$ :  $[\text{M}+\text{H}]^+$  Calcd for  $\text{C}_8\text{H}_9\text{ClNO}_3^+$  202.0265; Found 202.0261.

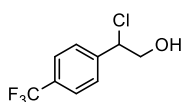

**4k**<sup>1</sup>, yield (42%), yellow oil;  $R_f = 0.35$  (EtOAc/cyclohexane = 1/10).  $^1\text{H NMR}$  (400 MHz,  $\text{CDCl}_3$ )  $\delta$  7.67 (d,  $J = 8.3$  Hz, 2H), 7.57 (d,  $J = 8.1$  Hz, 2H), 5.05 (t,  $J = 6.3$  Hz, 1H), 3.97 (t,  $J = 6.2$  Hz, 2H), 2.22 (t,  $J = 6.6$  Hz, 1H).  $^{13}\text{C NMR}$  (101 MHz,  $\text{CDCl}_3$ )  $\delta$  141.9 – 141.7 (m), 131.2, 130.9, 127.9, 126.0 – 125.6 (m), 125.2, 122.5, 67.7, 63.6.  $^{19}\text{F NMR}$  (376 MHz,  $\text{CDCl}_3$ )  $\delta$  -62.77. HRMS (*ESI*)  $m/z$ :  $[\text{M}+\text{K}]^+$  Calcd for  $\text{C}_9\text{H}_8\text{ClF}_3\text{OK}^+$  262.9853; Found 262.9856.

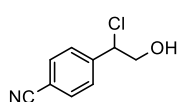

**4l**<sup>1</sup>, yield (40%), yellow oil;  $R_f = 0.35$  (EtOAc/cyclohexane = 1/5).  $^1\text{H NMR}$  (400 MHz,  $\text{CDCl}_3$ )  $\delta$  7.70 (d,  $J = 8.4$  Hz, 2H), 7.57 (d,  $J = 8.3$  Hz, 2H), 5.03 (t,  $J = 6.2$  Hz, 1H), 4.07 – 3.88 (m, 2H), 2.20 (s, 1H).  $^{13}\text{C NMR}$  (101 MHz,  $\text{CDCl}_3$ )  $\delta$  143.1, 132.6, 128.4, 118.3, 112.7, 67.5, 63.3.

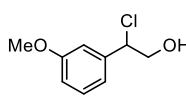

**4m**, yield (67%), yellow oil;  $R_f = 0.35$  (EtOAc/cyclohexane = 1/8).  $^1\text{H NMR}$  (400 MHz,  $\text{CDCl}_3$ )  $\delta$  7.31 (dd,  $J = 14.2, 6.3$  Hz, 1H), 7.02 – 6.96 (m, 2H), 6.91 (ddd,  $J = 8.3, 2.6, 0.9$  Hz, 1H), 4.98 (dd,  $J = 7.1, 6.0$  Hz, 1H), 3.98 – 3.92 (m, 2H), 3.84 (s, 3H), 2.20 (s, 1H).  $^{13}\text{C NMR}$  (101 MHz,  $\text{CDCl}_3$ )  $\delta$  159.8, 139.3, 129.9, 119.7, 114.3, 113.2, 67.9, 64.7, 55.3. HRMS (*ESI*)  $m/z$ :  $[\text{M}+\text{H}]^+$  Calcd for  $\text{C}_9\text{H}_{12}\text{ClO}_2^+$  187.0520; Found 187.0526.

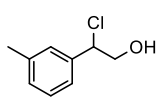

**4n**, yield (65%), yellow oil;  $R_f = 0.36$  (EtOAc/cyclohexane = 1/10).  $^1\text{H NMR}$  (400 MHz,  $\text{CDCl}_3$ )  $\delta$  7.29 (dd,  $J = 9.6, 5.3$  Hz, 1H), 7.23 (d,  $J = 9.8$  Hz, 2H), 7.18 (d,  $J = 7.5$  Hz, 1H), 4.98 (dd,  $J = 7.5, 5.7$  Hz, 1H), 4.04 – 3.85 (m, 2H), 2.40 (s, 3H), 2.29 (s, 1H).  $^{13}\text{C NMR}$  (101 MHz,  $\text{CDCl}_3$ )  $\delta$  138.6, 137.8, 129.7, 128.7, 128.1, 124.5, 67.9, 64.9, 21.4. HRMS (*ESI*)  $m/z$ :  $[\text{M}+\text{H}]^+$  Calcd for  $\text{C}_9\text{H}_{12}\text{ClO}^+$  171.0571; Found 171.0570.

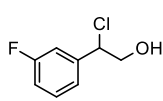

**4o**, yield (56%), yellow oil;  $R_f = 0.35$  (EtOAc/cyclohexane = 1/10).  $^1\text{H NMR}$  (400 MHz,  $\text{CDCl}_3$ )  $\delta$  7.37 (td,  $J = 8.0, 5.9$  Hz, 1H), 7.18 (ddd,  $J = 9.7, 6.4, 4.8$  Hz, 2H), 7.12 –

7.00 (m, 1H), 4.99 (t,  $J = 6.4$  Hz, 1H), 3.95 (d,  $J = 6.5$  Hz, 2H), 2.20 (s, 1H).  $^{13}\text{C}$  NMR (101 MHz,  $\text{CDCl}_3$ )  $\delta$  162.8 (d,  $J = 247.1$  Hz), 140.3 (d,  $J = 7.3$  Hz), 130.4 (d,  $J = 8.2$  Hz), 123.2 (d,  $J = 3.0$  Hz), 115.9 (d,  $J = 21.1$  Hz), 114.6 (d,  $J = 22.7$  Hz), 67.8, 63.8.  $^{19}\text{F}$  NMR (376 MHz,  $\text{CDCl}_3$ )  $\delta$  -111.96. HRMS (*ESI*)  $m/z$ :  $[\text{M}+\text{H}]^+$  Calcd for  $\text{C}_8\text{H}_9\text{ClFO}^+$  175.0320; Found 175.0319.

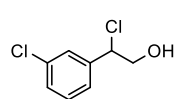

**4p**, yield (60%), yellow oil;  $R_f = 0.35$  (EtOAc/cyclohexane = 1/10).  $^1\text{H}$  NMR (400 MHz,  $\text{CDCl}_3$ )  $\delta$  7.50 – 7.40 (m, 1H), 7.37 – 7.28 (m, 3H), 5.06 – 4.90 (m, 1H), 3.94 (d,  $J = 6.5$  Hz, 2H), 2.22 (s, 1H).  $^{13}\text{C}$  NMR (101 MHz,  $\text{CDCl}_3$ )  $\delta$  139.9, 134.7, 130.1, 129.0, 127.7, 125.7, 67.7, 63.7. HRMS (*ESI*)  $m/z$ :  $[\text{M}+\text{Na}]^+$  Calcd for  $\text{C}_8\text{H}_8\text{Cl}_2\text{O}^+$  212.9844; Found 212.9851.

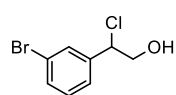

**4q**, yield (59%), yellow oil;  $R_f = 0.35$  (EtOAc/cyclohexane = 1/10).  $^1\text{H}$  NMR (400 MHz,  $\text{CDCl}_3$ )  $\delta$  7.59 (t,  $J = 1.8$  Hz, 1H), 7.49 (m, 1H), 7.36 (dd,  $J = 6.6, 1.2$  Hz, 1H), 7.28 (d,  $J = 7.8$  Hz, 1H), 4.94 (t,  $J = 6.4$  Hz, 1H), 4.04 – 3.85 (m, 2H), 2.41 (s, 1H).  $^{13}\text{C}$  NMR (101 MHz,  $\text{CDCl}_3$ )  $\delta$  140.1, 132.0, 130.6, 130.3, 126.2, 122.8, 67.7, 63.6. HRMS (*ESI*)  $m/z$ :  $[\text{M}+\text{H}]^+$  Calcd for  $\text{C}_8\text{H}_9\text{ClBrO}^+$  234.9520; Found 234.9514.

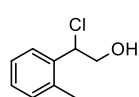

**4r**, yield (60%), yellow oil;  $R_f = 0.36$  (EtOAc/cyclohexane = 1/10).  $^1\text{H}$  NMR (400 MHz,  $\text{CDCl}_3$ )  $\delta$  7.50 (dd,  $J = 6.5, 2.6$  Hz, 1H), 7.29 – 7.25 (m, 2H), 7.24 – 7.19 (m, 1H), 5.31 (dd,  $J = 8.1, 5.0$  Hz, 1H), 4.10 – 3.85 (m, 2H), 2.44 (s, 3H), 2.35 (s, 1H).  $^{13}\text{C}$  NMR (101 MHz,  $\text{CDCl}_3$ )  $\delta$  135.9, 130.8, 128.7, 126.9, 126.7, 67.0, 61.3, 19.2. HRMS (*ESI*)  $m/z$ :  $[\text{M}+\text{H}]^+$  Calcd for  $\text{C}_9\text{H}_{12}\text{ClO}^+$  171.0571; Found 171.0565.

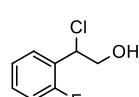

**4s**, yield (57%), yellow oil;  $R_f = 0.35$  (EtOAc/cyclohexane = 1/10).  $^1\text{H}$  NMR (400 MHz,  $\text{CDCl}_3$ )  $\delta$  7.55 (t,  $J = 7.4$  Hz, 1H), 7.39 – 7.31 (m, 1H), 7.21 (t,  $J = 7.6$  Hz, 1H), 7.15 – 7.02 (m, 1H), 5.38 (t,  $J = 6.3$  Hz, 1H), 4.00 (d,  $J = 6.3$  Hz, 2H), 2.27 (s, 1H).  $^{13}\text{C}$  NMR (101 MHz,  $\text{CDCl}_3$ )  $\delta$  159.8 (d,  $J = 248.3$  Hz), 130.5 (d,  $J = 8.4$  Hz), 129.1 (d,  $J = 3.1$  Hz), 125.1 (d,  $J = 12.8$  Hz), 124.6 (d,  $J = 3.6$  Hz), 115.7 (d,  $J = 21.8$  Hz), 66.9, 57.7, 26.3.  $^{19}\text{F}$  NMR (376 MHz,  $\text{CDCl}_3$ )  $\delta$  -117.50. HRMS (*ESI*)  $m/z$ :  $[\text{M}+\text{K}]^+$  Calcd for  $\text{C}_8\text{H}_8\text{ClFOK}^+$  212.9885; Found 212.9879.

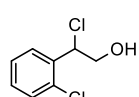

**4t<sup>1</sup>**, yield (54%), yellow oil;  $R_f = 0.35$  (EtOAc/cyclohexane = 1/10).  $^1\text{H}$  NMR (400 MHz,  $\text{CDCl}_3$ )  $\delta$  7.65 (dd,  $J = 7.6, 1.8$  Hz, 1H), 7.41 (dd,  $J = 7.7, 1.5$  Hz, 1H), 7.35 (td,  $J = 7.5, 1.5$  Hz, 1H), 7.32 – 7.27 (m, 1H), 5.59 (dd,  $J = 7.7, 4.4$  Hz, 1H), 4.01 (d,  $J = 11.8$  Hz, 1H), 3.91 (d,  $J = 11.9$  Hz, 1H), 2.28 (s, 1H).  $^{13}\text{C}$  NMR (101 MHz,  $\text{CDCl}_3$ )  $\delta$  135.3, 133.0, 129.8, 129.7, 129.1, 127.4, 66.8, 61.0.

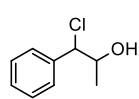

**4u<sup>1</sup>**, yield (60%, dr > 20:1), yellow oil;  $R_f = 0.36$  (EtOAc/cyclohexane = 1/10).  $^1\text{H}$  NMR (400 MHz,  $\text{CDCl}_3$ )  $\delta$  7.45 (d,  $J = 7.5$  Hz, 2H), 7.38 (dt,  $J = 16.6, 6.9$  Hz, 3H), 4.83 (d,  $J = 5.9$  Hz, 1H), 4.18 (dq,  $J = 11.4, 5.7$  Hz, 1H), 1.99 (d,  $J = 4.7$  Hz, 1H), 1.31 (d,  $J = 6.2$  Hz, 3H).  $^{13}\text{C}$  NMR (101 MHz,  $\text{CDCl}_3$ )  $\delta$  137.8, 128.7, 128.6, 128.1, 71.8, 68.2, 19.0.

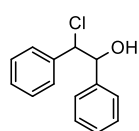

**4v** (1.2:1), yield (47%), yellow oil;  $R_f = 0.38$  (EtOAc/cyclohexane = 1/10).  $^1\text{H}$  NMR (400 MHz,  $\text{CDCl}_3$ )  $\delta$  7.38 – 7.32 (m, 8H), 7.30 (dd,  $J = 4.6, 3.1$  Hz, 2H), 7.27 – 7.17 (m, 6H), 7.13 (dd,  $J = 6.8, 2.8$  Hz, 2H), 5.11 (d,  $J = 6.5$  Hz, 1H), 5.04 (d,  $J = 6.5$  Hz, 1H), 5.03 (d,  $J = 3.1$  Hz, 1H), 4.98 (d,  $J = 8.3$  Hz, 1H), 3.09 (s, 1H), 2.40 (s, 1H).  $^{13}\text{C}$  NMR (101 MHz,  $\text{CDCl}_3$ )  $\delta$  139.5, 138.7, 137.7, 137.2, 128.7, 128.6, 128.5, 128.39, 128.35, 128.3, 128.21, 128.19, 128.15, 128.0, 127.1, 127.0, 78.8, 78.2, 70.7, 66.9. HRMS (*ESI*)  $m/z$ :  $[\text{M}+\text{H}]^+$  Calcd for  $\text{C}_{14}\text{H}_{14}\text{ClO}^+$  233.0728; Found 233.0721.

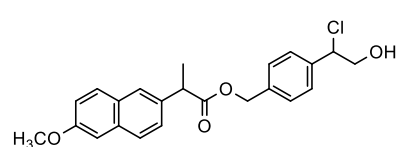

**4y** (>20:1), yield (53%), yellow oil;  $R_f = 0.38$  (EtOAc/cyclohexane = 1/5).  $^1\text{H NMR}$  (400 MHz,  $\text{CDCl}_3$ )  $\delta$  7.71 (t,  $J = 8.3$  Hz, 2H), 7.66 (s, 1H), 7.41 (dd,  $J = 8.5, 1.4$  Hz, 1H), 7.34 (d,  $J = 8.1$  Hz, 2H), 7.25 (d,  $J = 8.2$  Hz, 2H), 7.19 – 7.12 (m, 2H), 5.20 – 5.07 (m, 2H), 5.02 – 4.90 (m, 1H), 3.94 (s, 3H), 3.92 (dd,  $J = 7.1, 3.7$  Hz, 2H), 2.10 (s, 1H), 1.62 (d,  $J = 7.2$  Hz, 3H).  $^{13}\text{C NMR}$  (101 MHz,  $\text{CDCl}_3$ )  $\delta$  174.4, 157.7, 137.6, 136.8, 135.4, 133.7, 129.3, 128.9, 128.2, 127.6, 127.2, 126.2, 126.0, 119.0, 105.6, 67.8, 65.9, 64.4, 55.3, 45.5, 18.5. HRMS (*ESI*)  $m/z$ :  $[\text{M}+\text{Na}]^+$  Calcd for  $\text{C}_{23}\text{H}_{23}\text{ClNaO}_4^+$  421.1177; Found 421.1184.

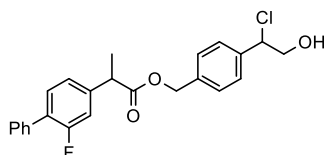

**4z** (>20:1), yield (64%), yellow oil;  $R_f = 0.35$  (EtOAc/cyclohexane = 1/8).  $^1\text{H NMR}$  (400 MHz,  $\text{CDCl}_3$ )  $\delta$  7.60 – 7.54 (m, 2H), 7.48 (dd,  $J = 10.3, 4.7$  Hz, 2H), 7.44 – 7.37 (m, 4H), 7.31 (d,  $J = 8.2$  Hz, 2H), 7.20 – 7.10 (m, 2H), 5.25 – 5.10 (m, 2H), 5.00 (dd,  $J = 7.2, 5.8$  Hz, 1H), 3.94 (d,  $J = 5.0$  Hz, 2H), 3.84 (q,  $J = 7.1$  Hz, 1H), 2.21 (s, 1H), 1.59 (d,  $J = 7.2$  Hz, 3H).  $^{13}\text{C NMR}$  (101 MHz,  $\text{CDCl}_3$ )  $\delta$  173.7, 159.7 (d,  $J = 248.5$  Hz), 141.5 (d,  $J = 7.6$  Hz), 137.9, 136.6, 135.4 (d,  $J = 1.1$  Hz), 130.8 (d,  $J = 3.9$  Hz), 129.0, 128.9, 128.5, 128.3, 127.73, 127.70, 123.6 (d,  $J = 3.2$  Hz), 115.3 (d,  $J = 23.7$  Hz), 67.8, 66.1, 64.4, 45.0, 18.3.  $^{19}\text{F NMR}$  (376 MHz,  $\text{CDCl}_3$ )  $\delta$  -117.56. HRMS (*ESI*)  $m/z$ :  $[\text{M}+\text{H}]^+$  Calcd for  $\text{C}_{24}\text{H}_{23}\text{ClFNaO}_3^+$  413.1314; Found 413.1311.

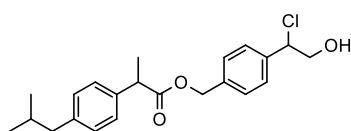

**4aa** (>20:1), yield (61%), yellow oil;  $R_f = 0.38$  (EtOAc/cyclohexane = 1/8).  $^1\text{H NMR}$  (400 MHz,  $\text{CDCl}_3$ )  $\delta$  7.36 (dd,  $J = 8.6, 2.1$  Hz, 2H), 7.24 (dd,  $J = 14.0, 5.6$  Hz, 4H), 7.12 (d,  $J = 8.1$  Hz, 2H), 5.12 (s, 2H), 4.99 (dd,  $J = 7.4, 5.6$  Hz, 1H), 3.93 (d,  $J = 5.6$  Hz, 2H), 3.77 (q,  $J = 7.2$  Hz, 1H), 2.48 (d,  $J = 7.2$  Hz, 2H), 2.15 (t,  $J = 6.3$  Hz, 1H), 1.95 – 1.81 (m, 1H), 1.53 (d,  $J = 7.2$  Hz, 3H), 0.93 (d,  $J = 6.6$  Hz, 6H).  $^{13}\text{C NMR}$  (101 MHz,  $\text{CDCl}_3$ )  $\delta$  174.5, 140.7, 137.6, 137.5, 136.9, 129.4, 128.0, 127.6, 127.2, 67.8, 65.7, 64.5, 45.1, 45.0, 30.2, 26.7, 22.4, 18.4. HRMS (*ESI*)  $m/z$ :  $[\text{M}+\text{H}]^+$  Calcd for  $\text{C}_{22}\text{H}_{28}\text{ClO}_3^+$  375.1721; Found 375.1717.

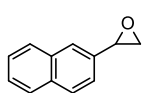

**5<sup>2</sup>**, yield (87%), yellow oil;  $R_f = 0.34$  (EtOAc/cyclohexane = 1/10).  $^1\text{H NMR}$  (400 MHz,  $\text{CDCl}_3$ )  $\delta$  7.93 – 7.77 (m, 4H), 7.59 – 7.45 (m, 2H), 7.36 (dd,  $J = 8.5, 1.7$  Hz, 1H), 4.06 (dd,  $J = 4.0, 2.6$  Hz, 1H), 3.25 (dd,  $J = 5.4, 4.1$  Hz, 1H), 2.94 (dd,  $J = 5.4, 2.6$  Hz, 1H).  $^{13}\text{C NMR}$  (101 MHz,  $\text{CDCl}_3$ )  $\delta$  135.1, 133.3, 133.2, 128.4, 127.8, 126.4, 126.1, 125.2, 122.7, 52.6, 51.3.

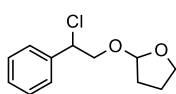

**6**, yield (72%, d.r. = 1:1), yellow oil;  $^1\text{H NMR}$  (400 MHz,  $\text{CDCl}_3$ )  $\delta$  7.46 – 7.41 (m, 2H), 7.40 – 7.32 (m, 3H), 5.23 (d,  $J = 4.2$  Hz, 0.5H), 5.14 – 5.09 (m, 0.5H), 5.04 (dd,  $J = 7.9, 5.6$  Hz, 1H), 4.07 (dd,  $J = 11.1, 7.1$  Hz, 0.5H), 4.03 (dd,  $J = 11.1, 5.5$  Hz, 0.5H), 3.89 (d,  $J = 6.6$  Hz, 1H), 3.87 – 3.81 (m, 1.5H), 3.80 – 3.74 (m, 0.5H), 2.01 – 1.92 (m, 2H), 1.92 – 1.79 (m, 2H).  $^{13}\text{C NMR}$  (101 MHz,  $\text{CDCl}_3$ )  $\delta$  139.0, 138.8, 128.60, 128.55, 128.54, 128.50, 127.6, 127.5, 104.4, 103.9, 71.9, 71.5, 67.2, 67.1, 61.8, 61.0, 32.4, 32.3, 23.28, 23.27.

## References

1. L. Yang, X. Li, Y. Wang, C. Li, X. Wu, Z. Zhang, X. Xie, *Tetrahedron* 2020, **76**, 131114.
2. C. Yang, Z. Chen, Z. Wu, Q. Zheng, Y. Xue, X. Zeng, W. M. W. W. Kandegama, G. Zhang, R. Guo, *Green Chem.*, 2025, **27**, 13651–13657.

## Radical inhibition and trapping experiments

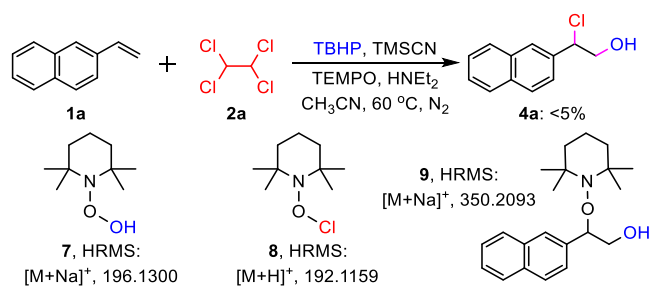

To a solution of **1a** (0.5 mmol, 1.0 equiv.) in 1,1,2,2-tetrachloroethane (**2a**, 0.5 mL) was added **3a** (3.0 mmol, 6.0 equiv.), HNEt<sub>2</sub> (0.5 mmol, 1.0 equiv.), TMSCN (2.0 mmol, 4.0 equiv.), TEMPO (1.0 mmol, 2.0 equiv.) and CH<sub>3</sub>CN at room temperature. Then the solution mixture was stirred at 60 °C for 24 h.

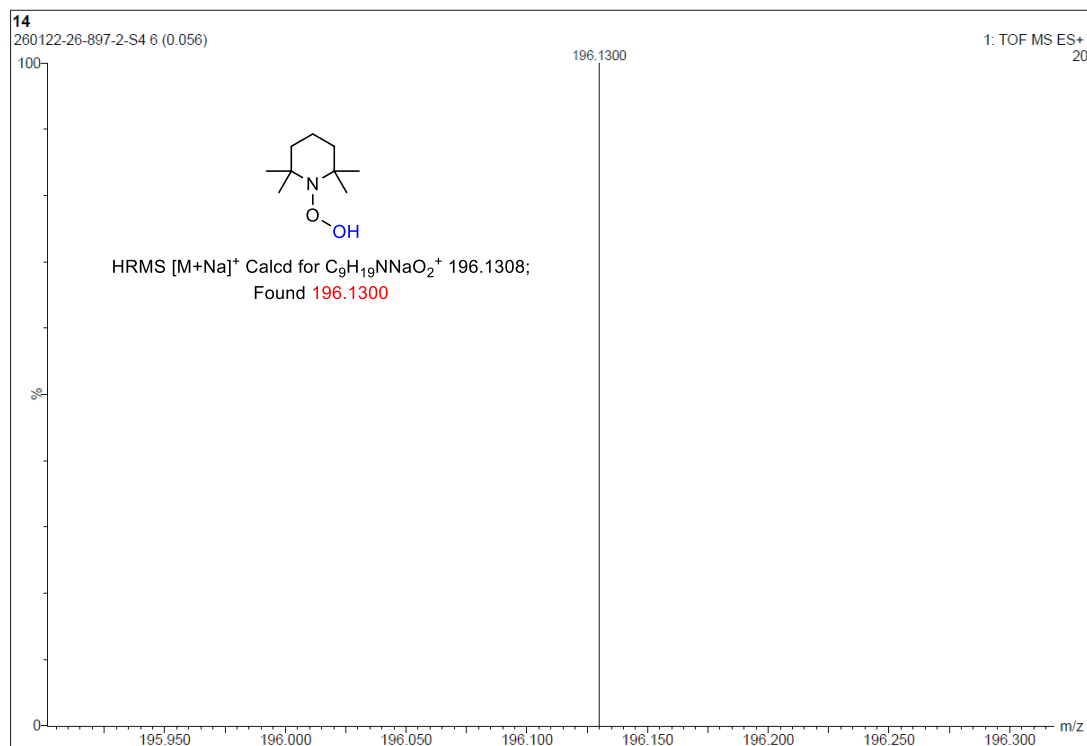

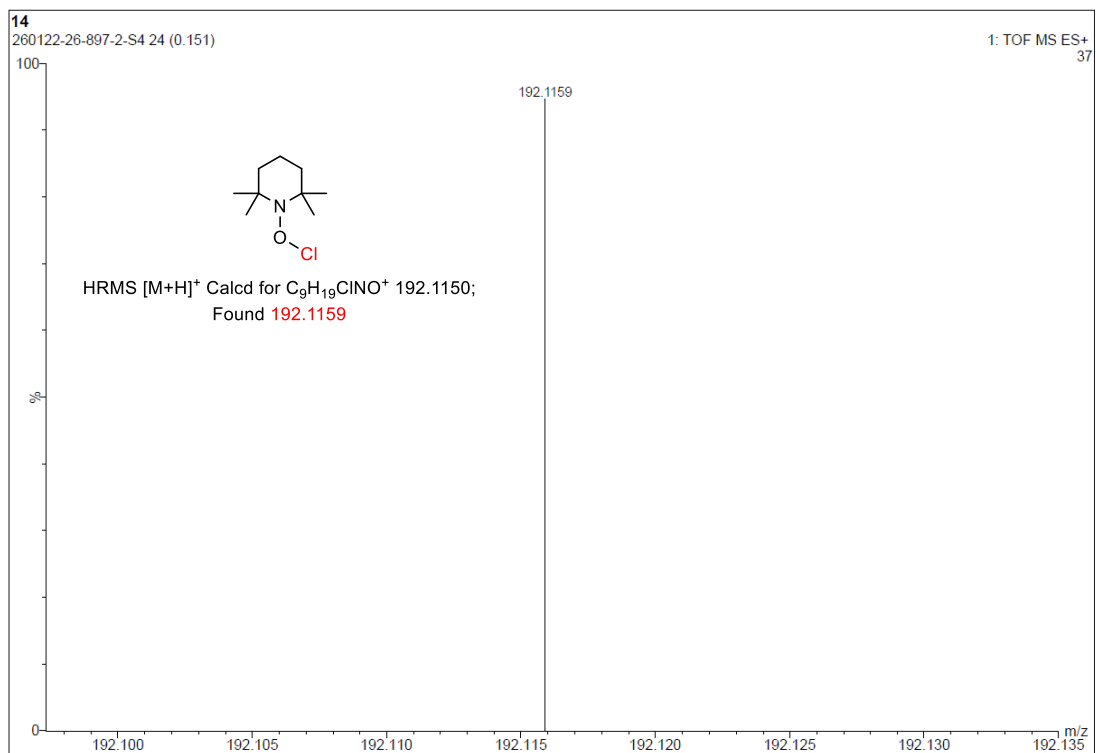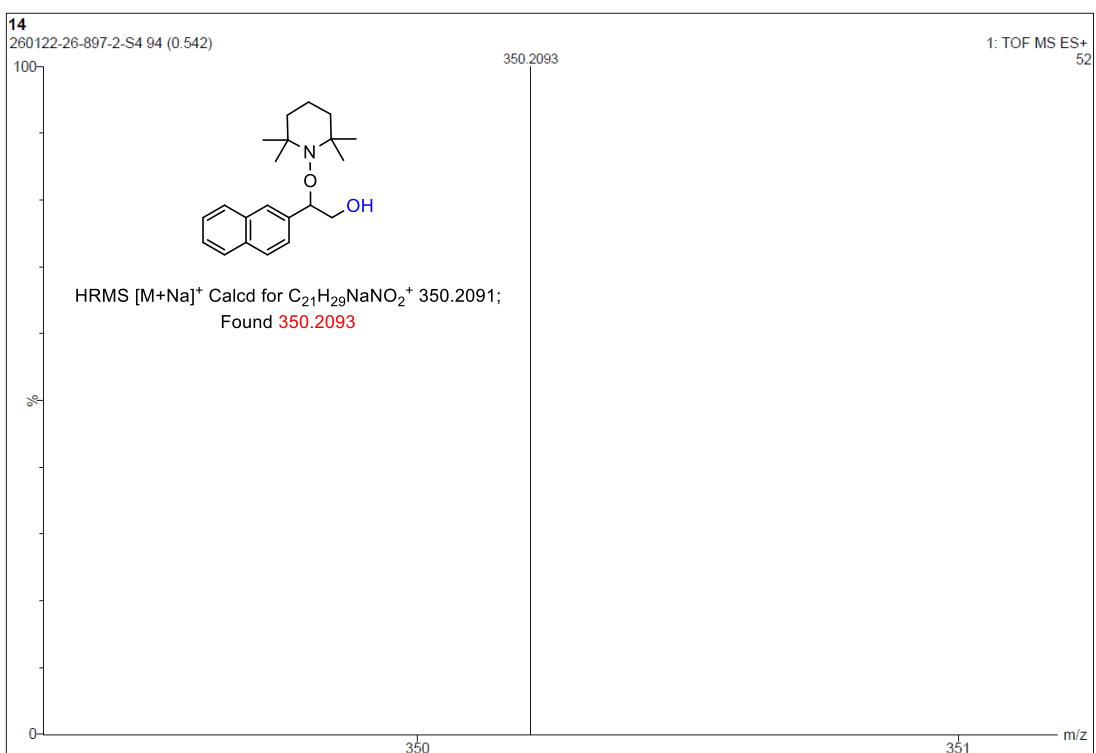



# Copies of $^1\text{H}$ , $^{13}\text{C}$ NMR spectra

4a

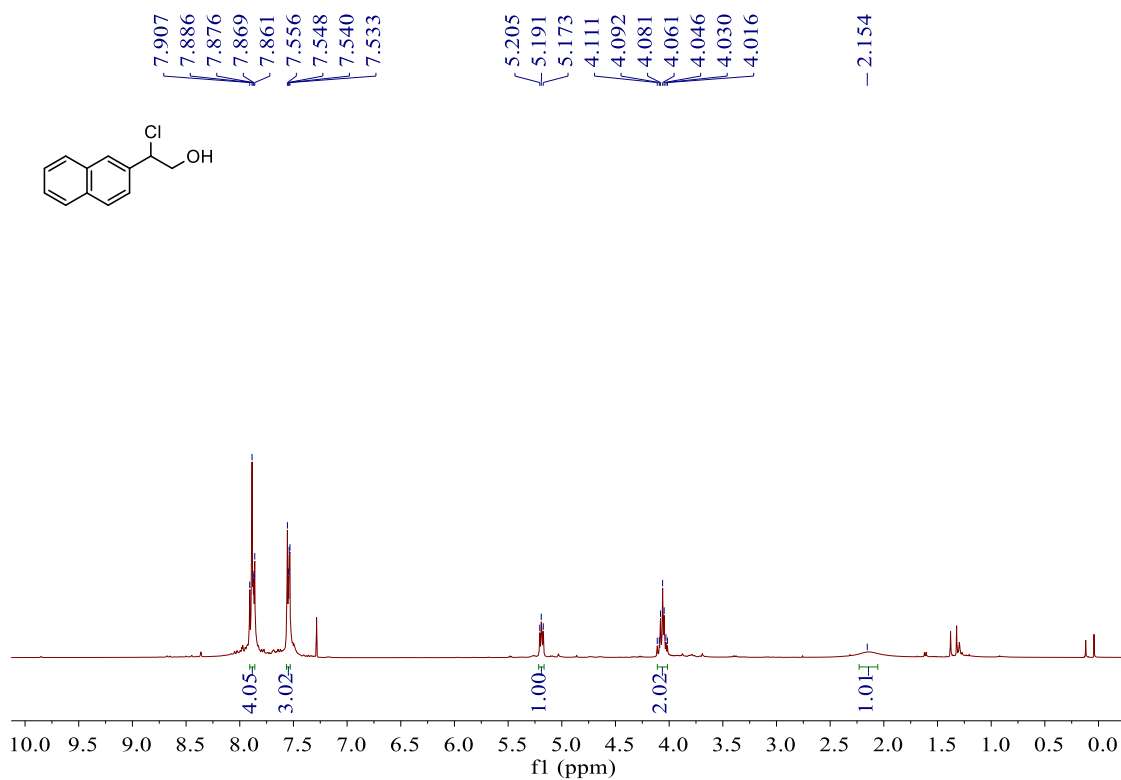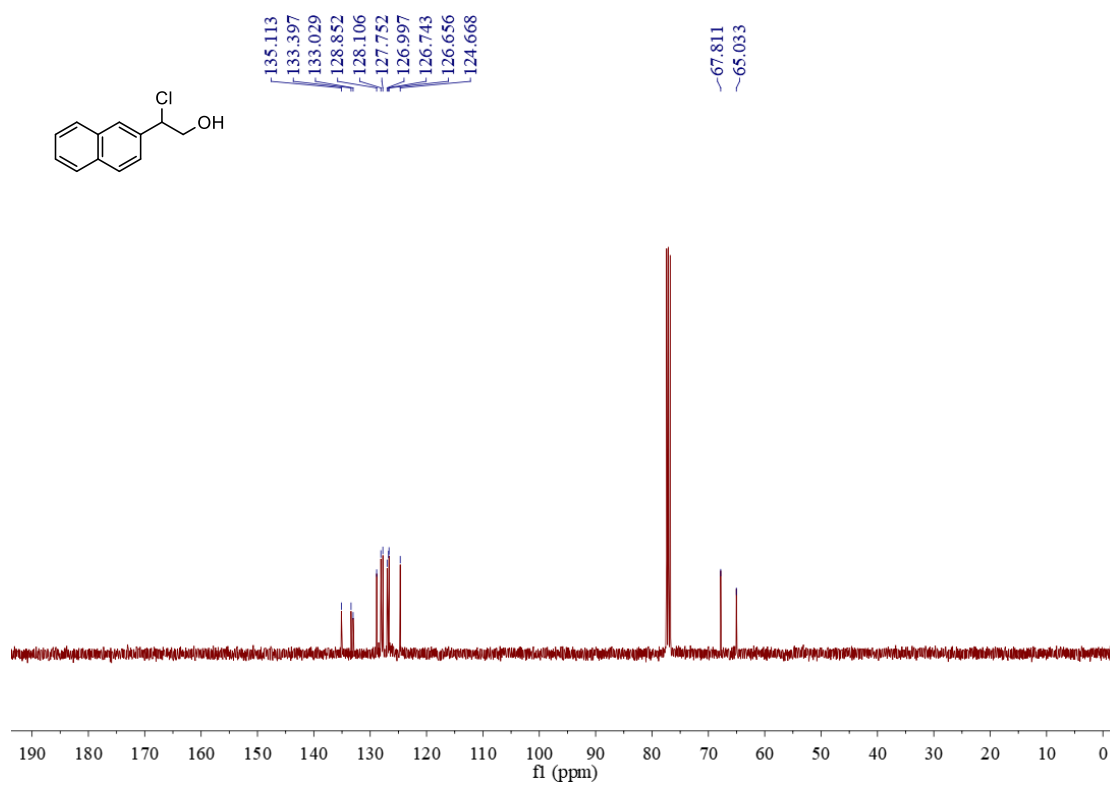

4b

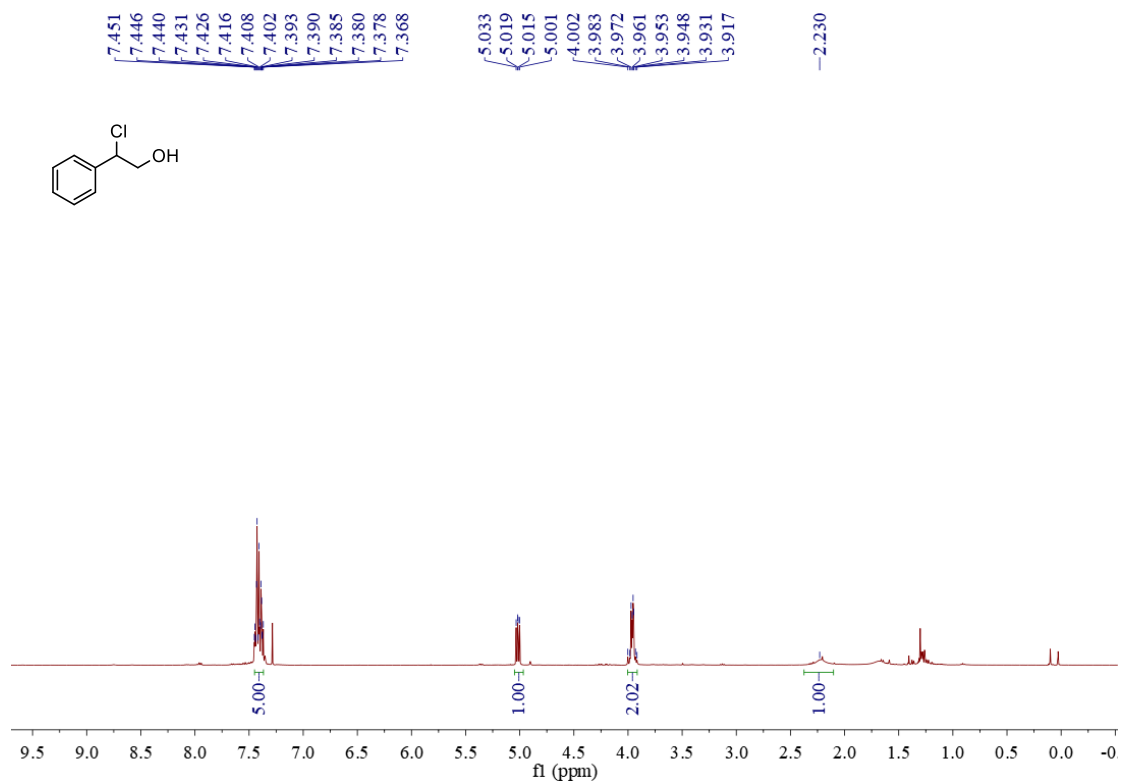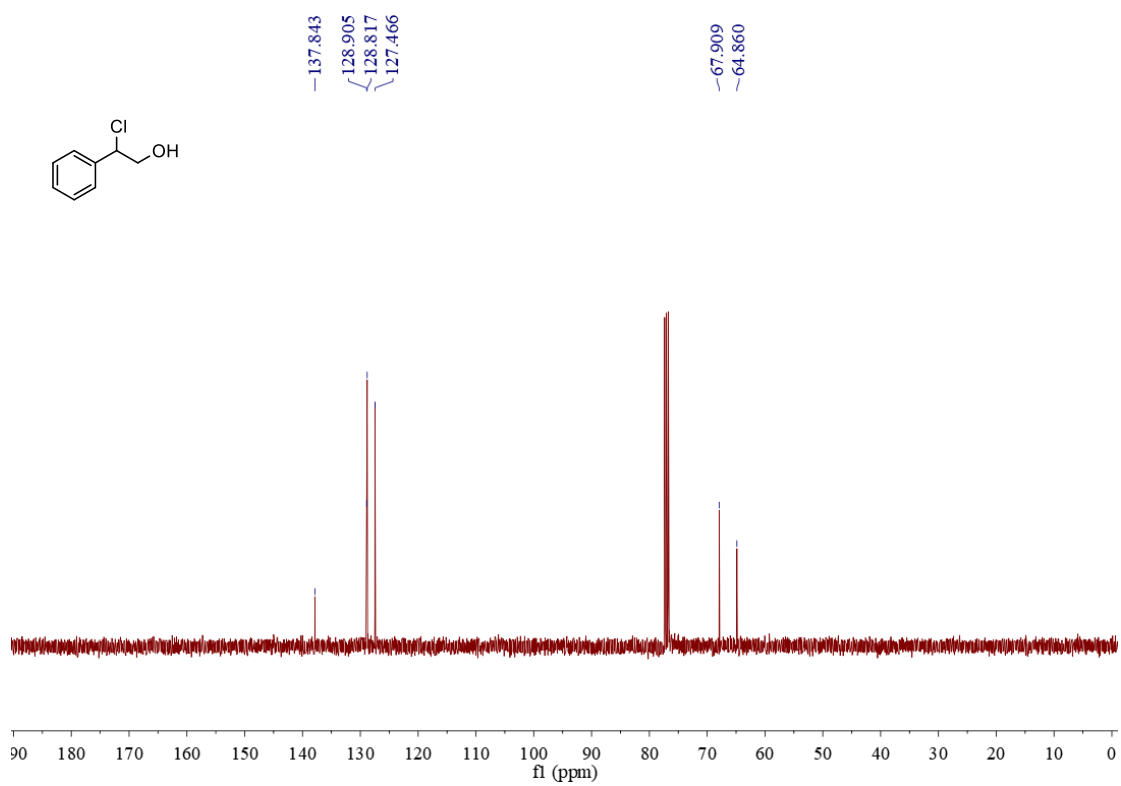

4c

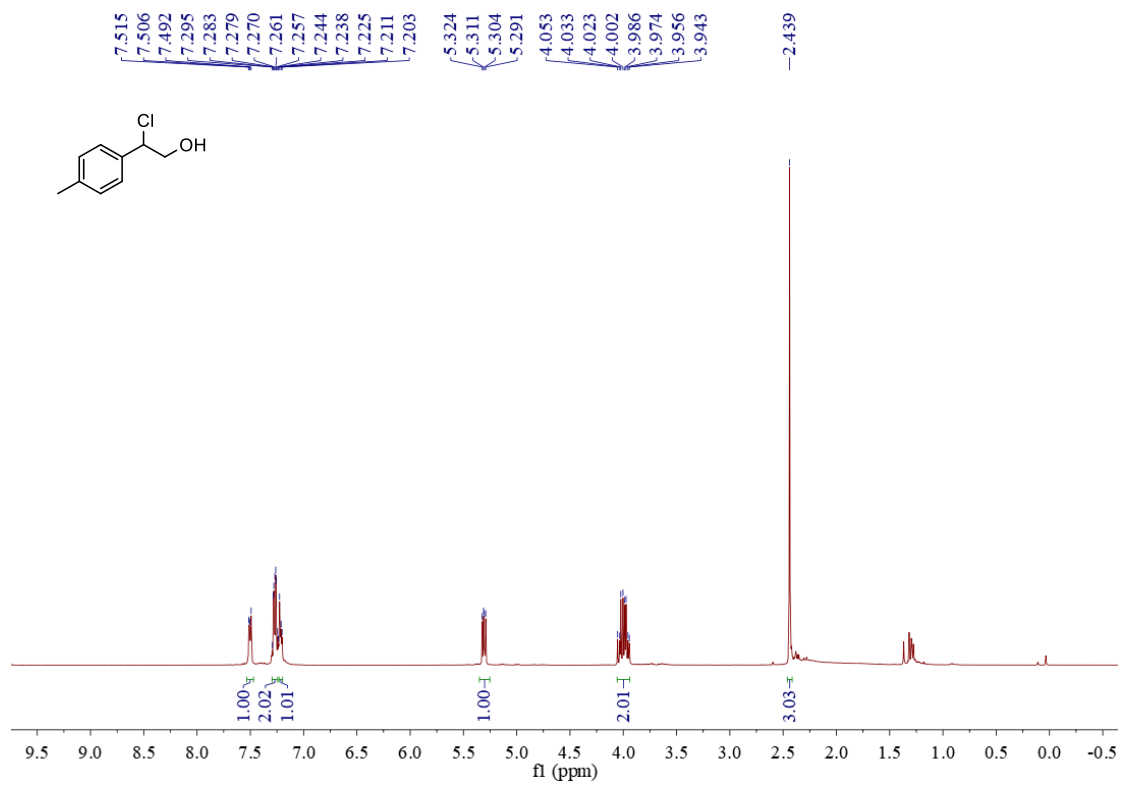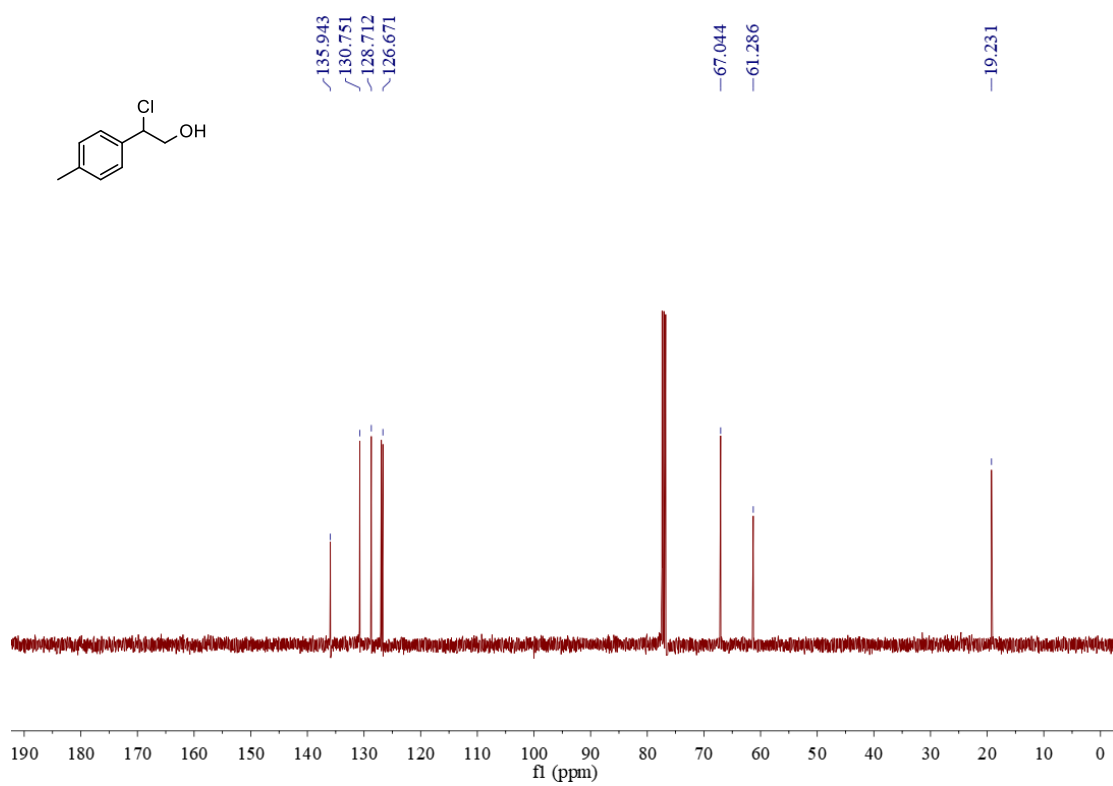

4d

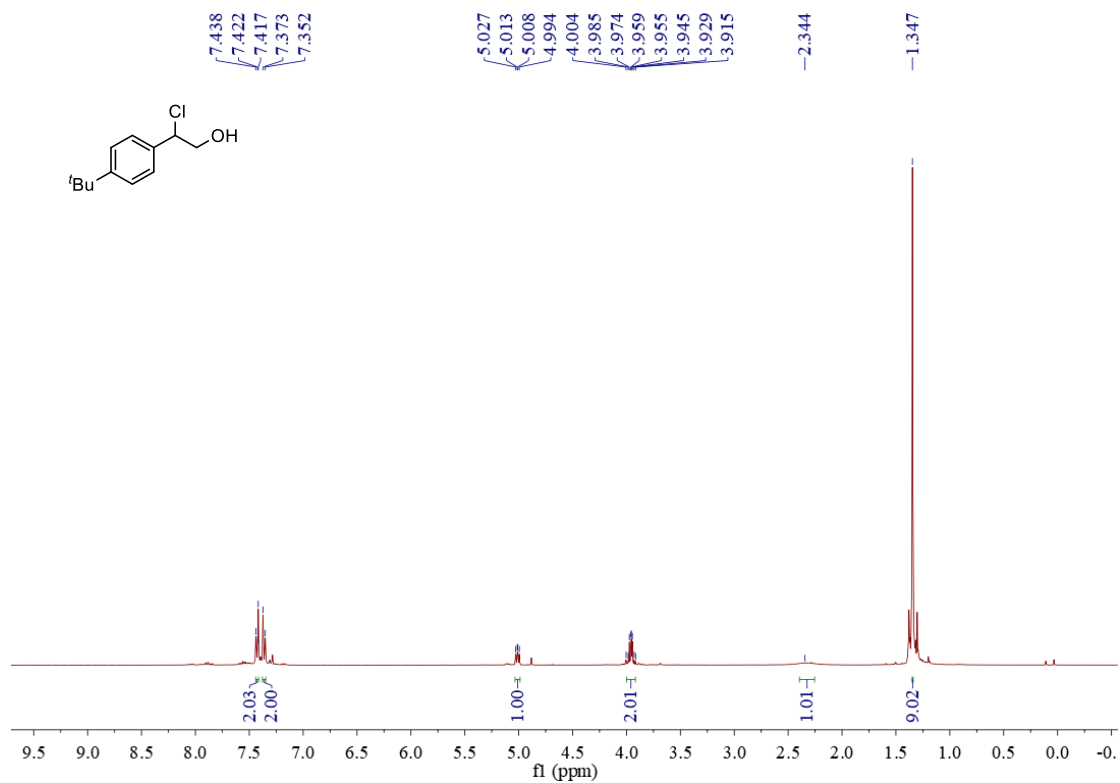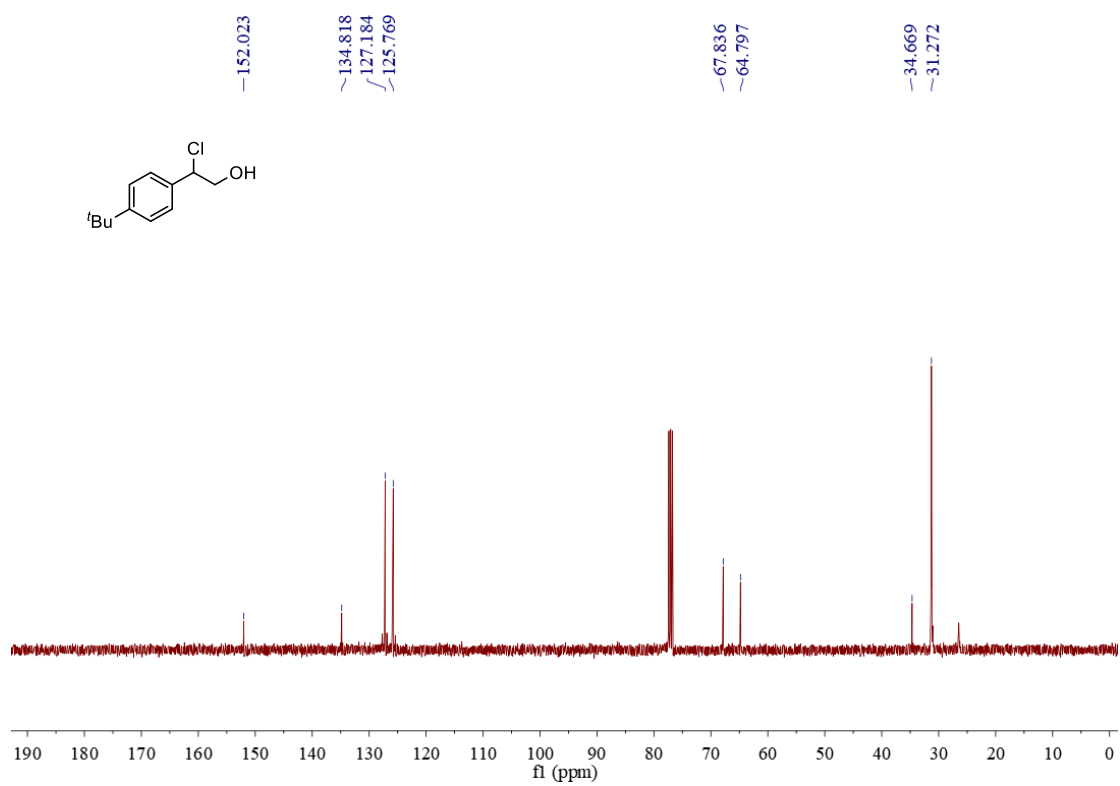

4e

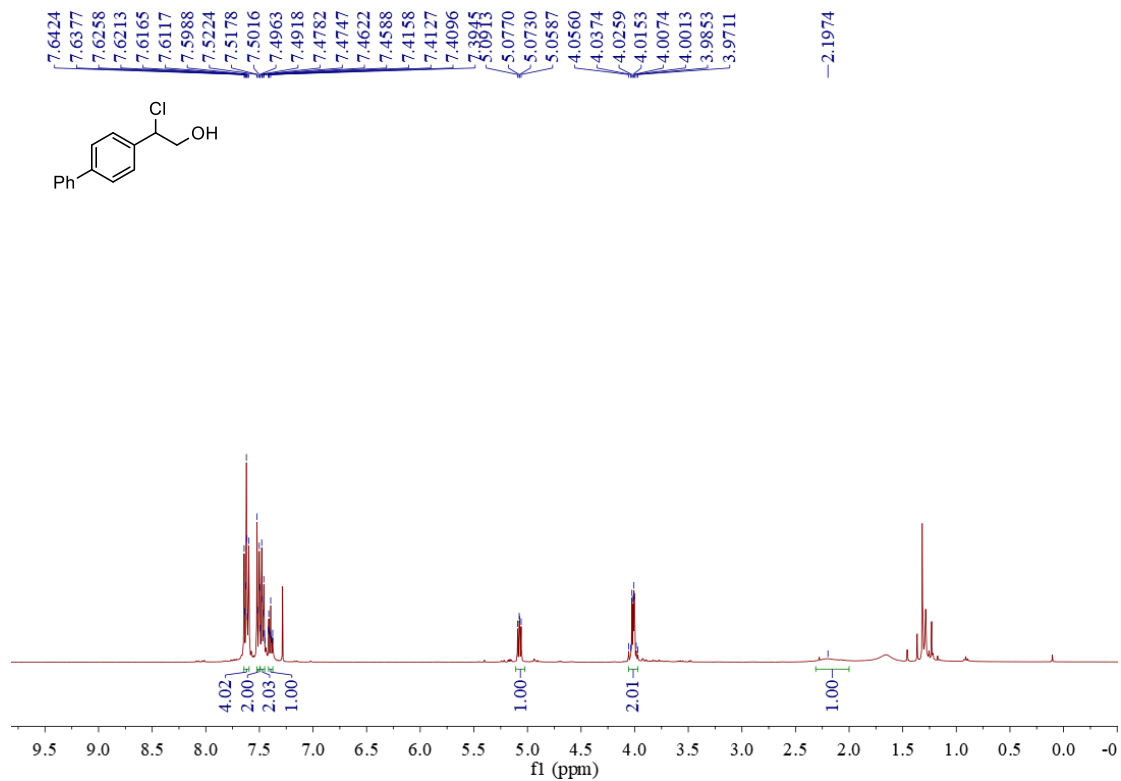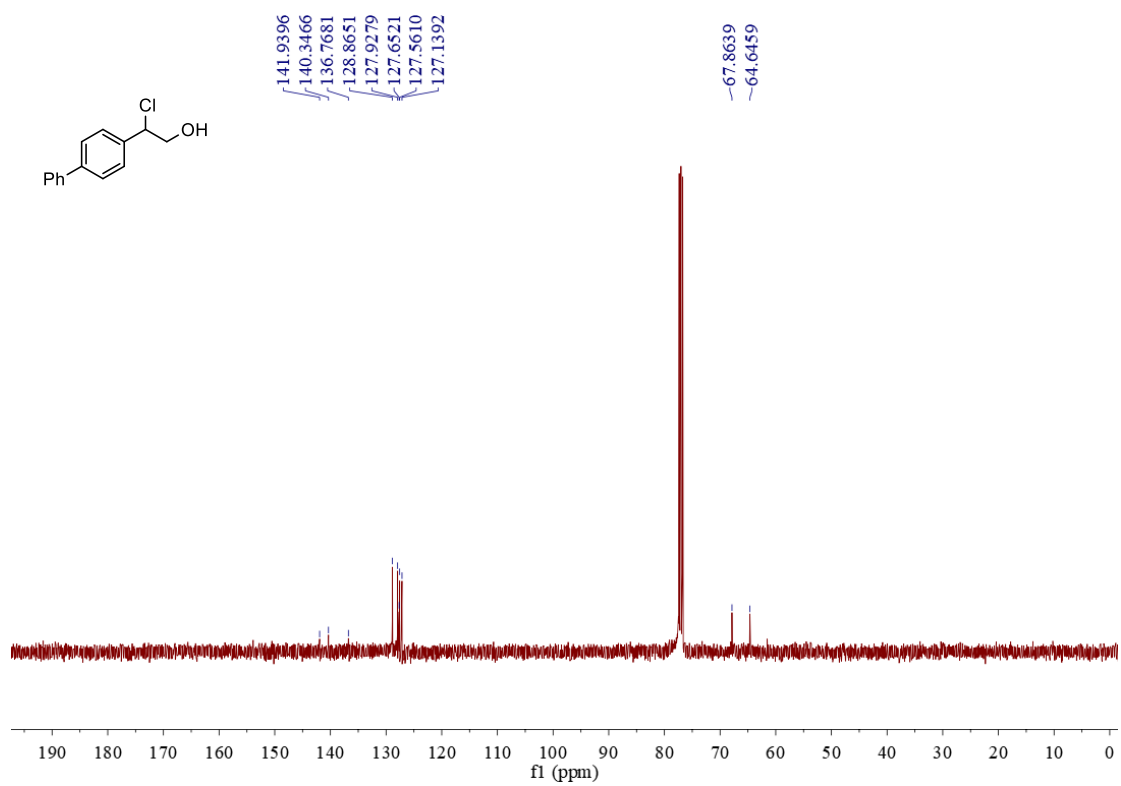

4f

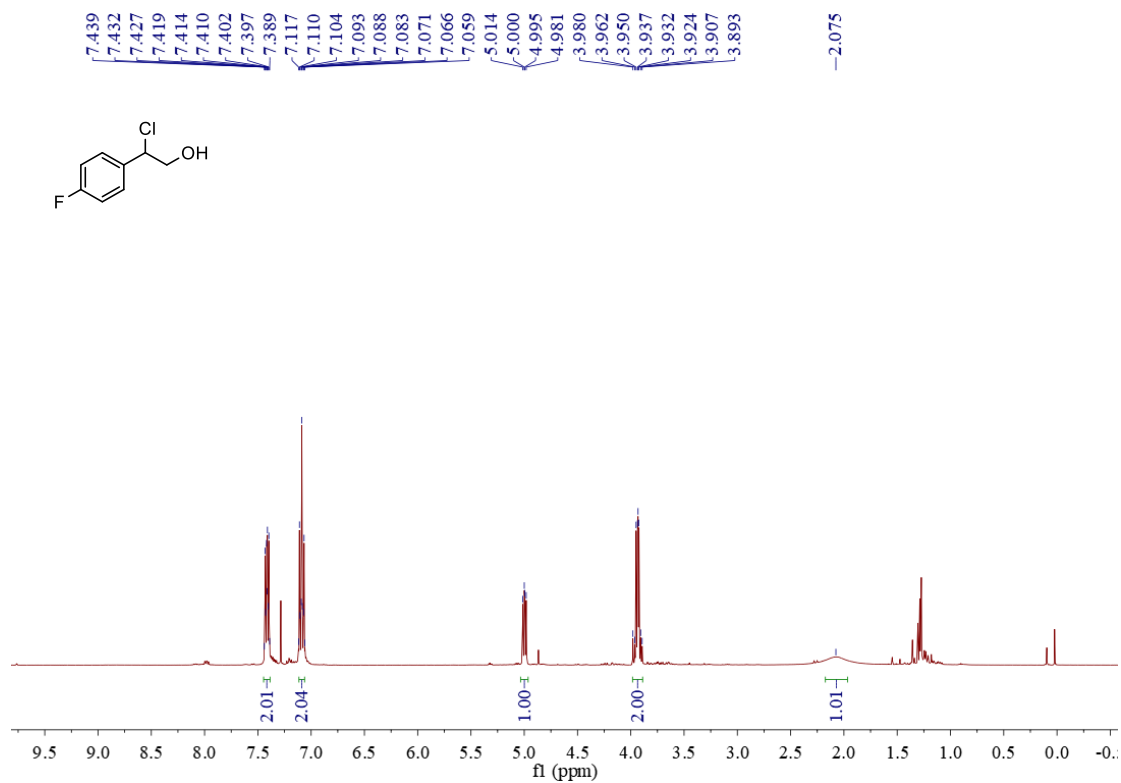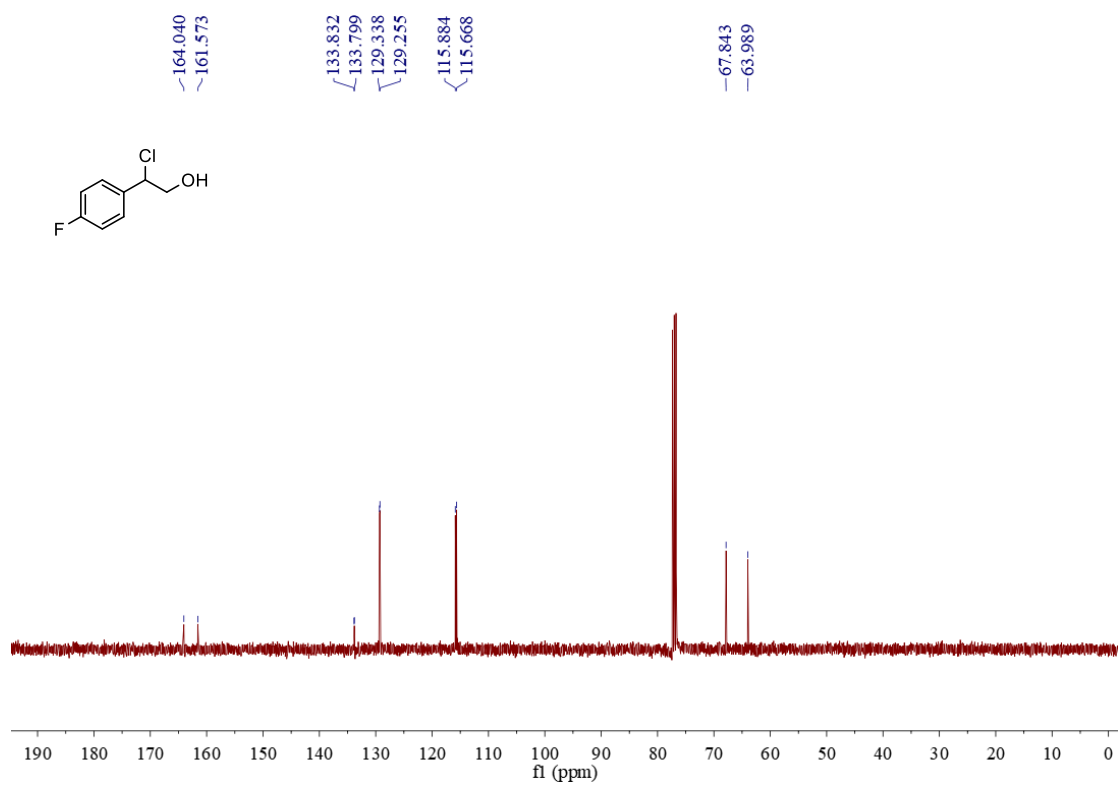

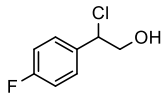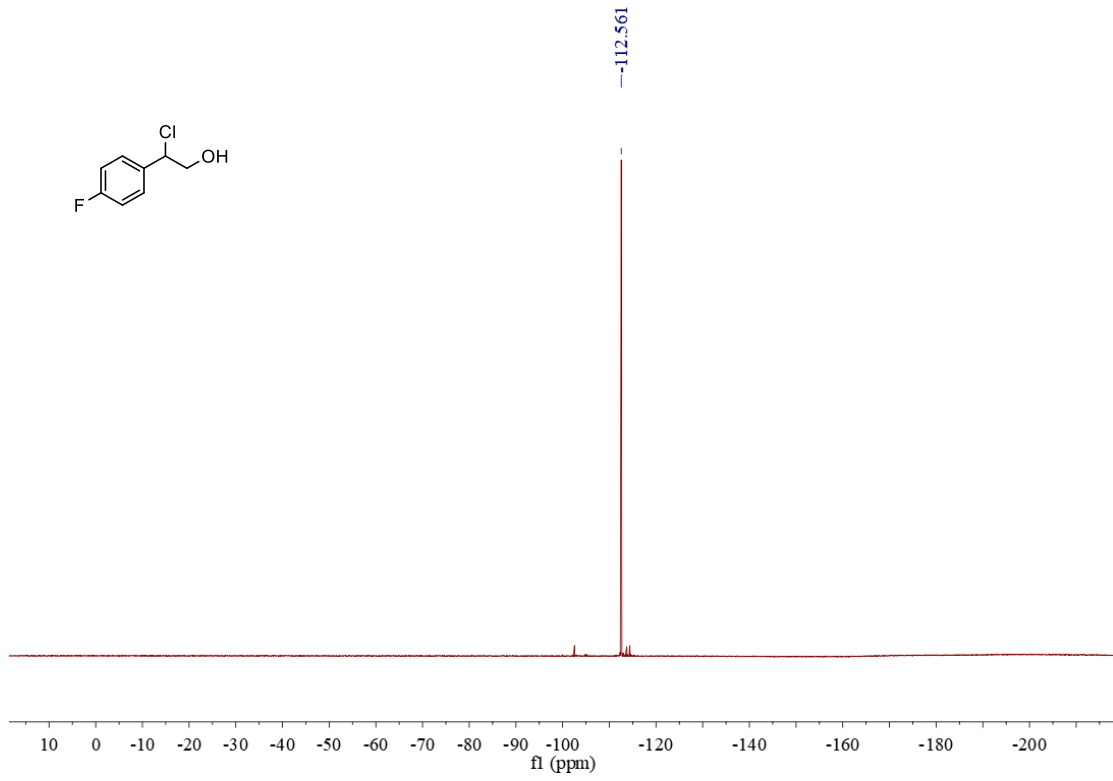

4g

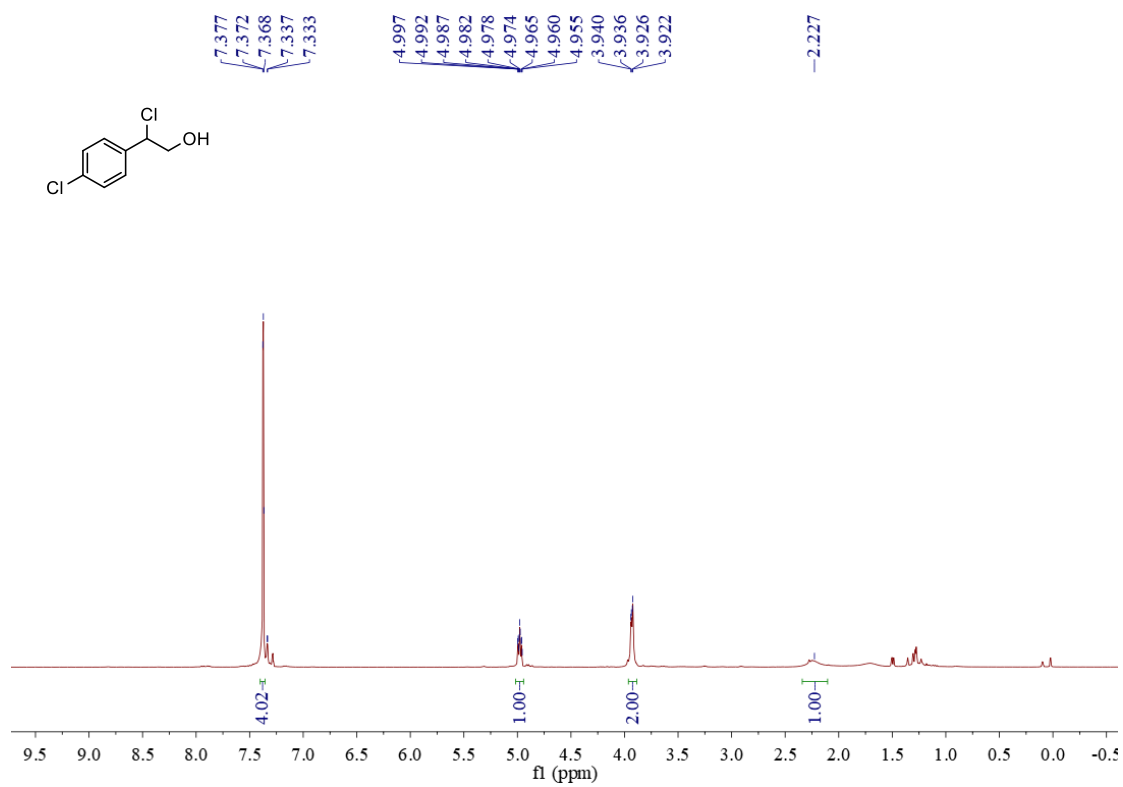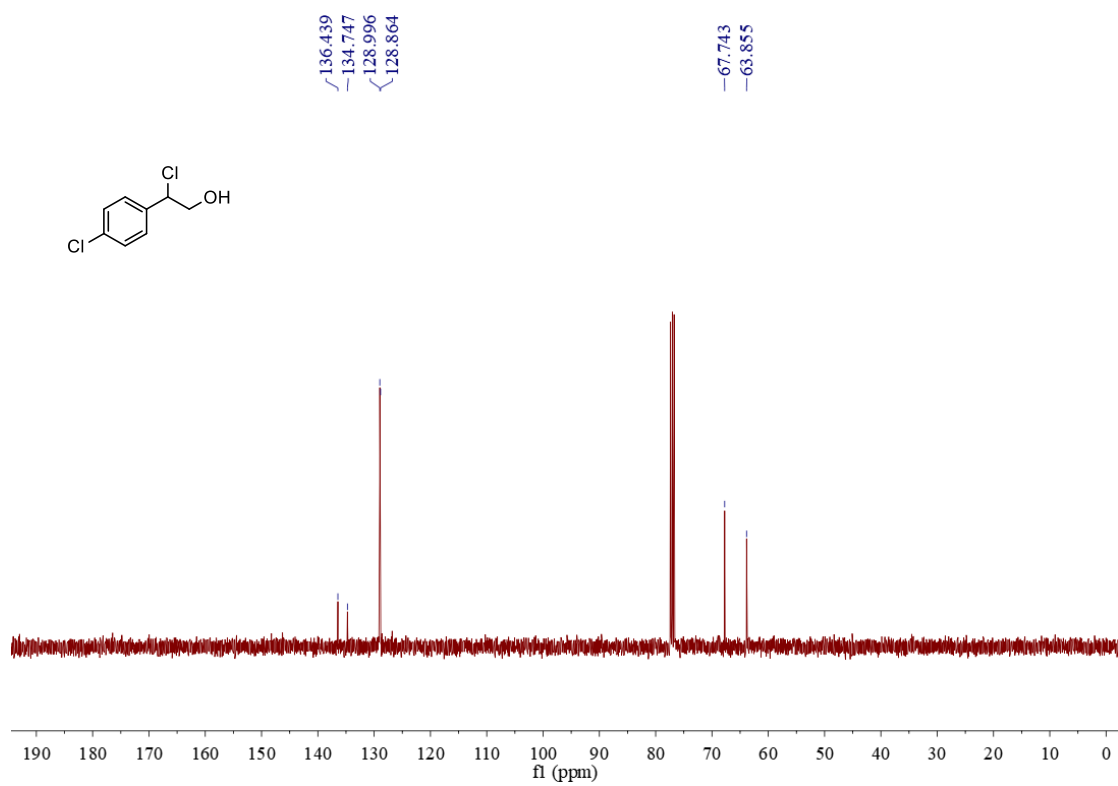

4h

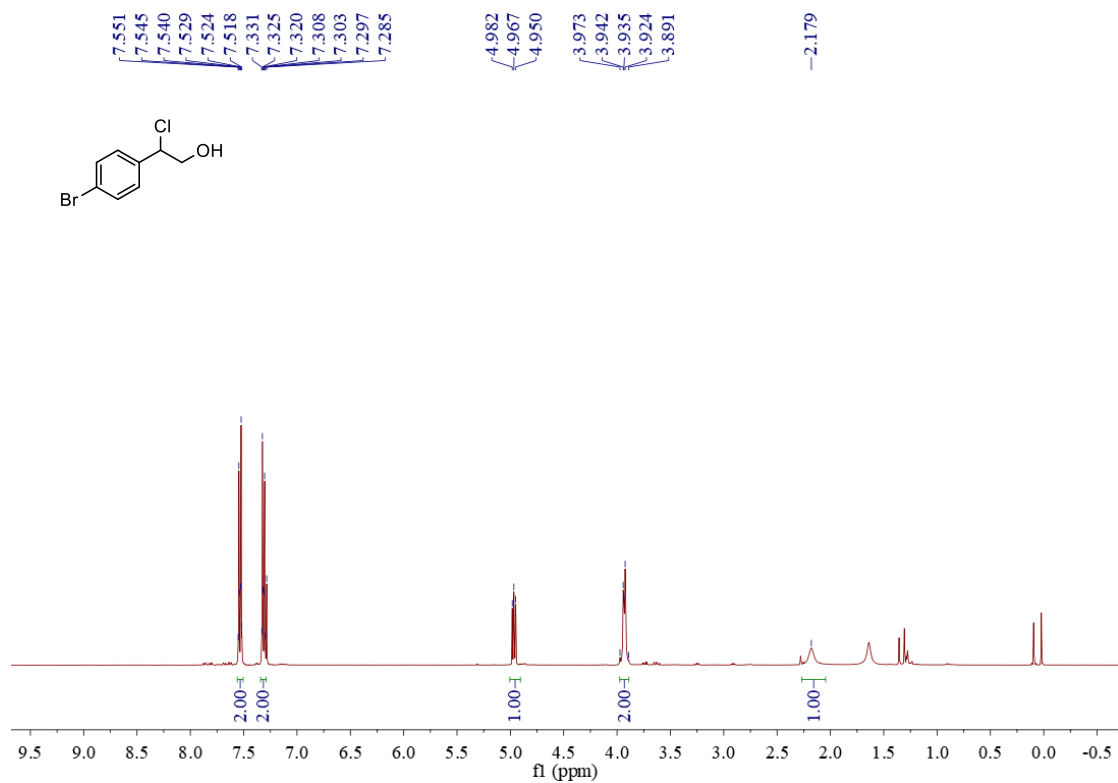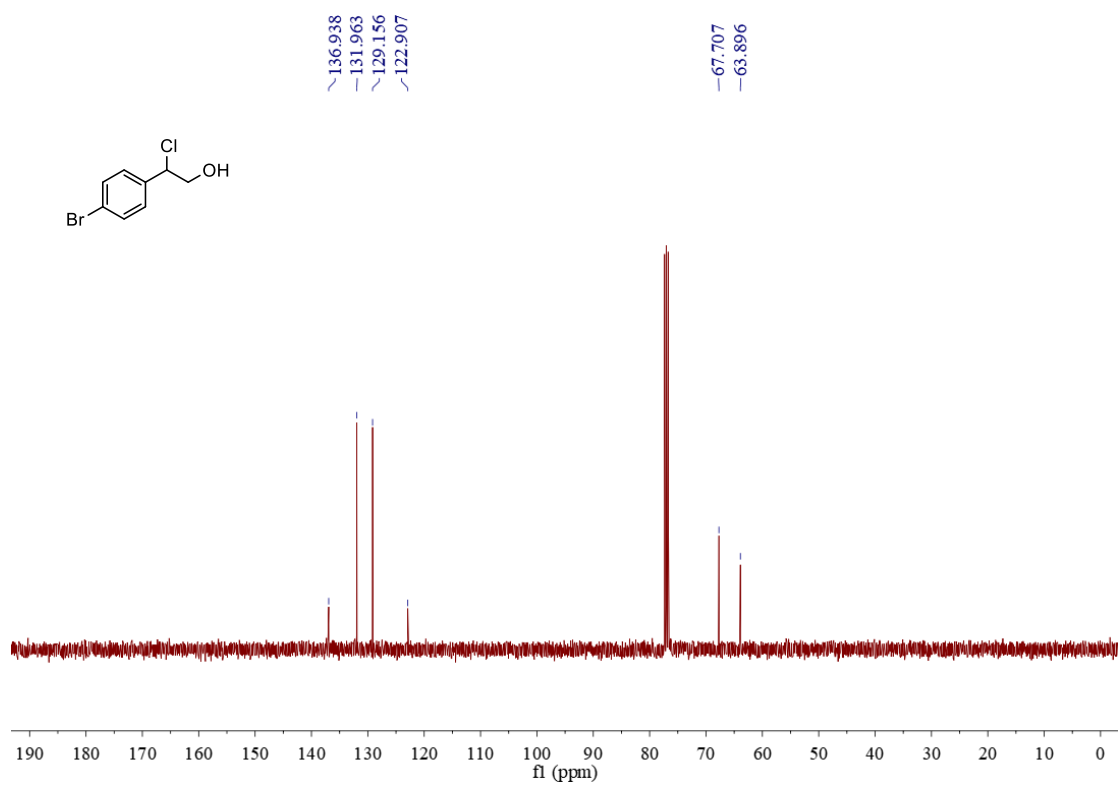

4i

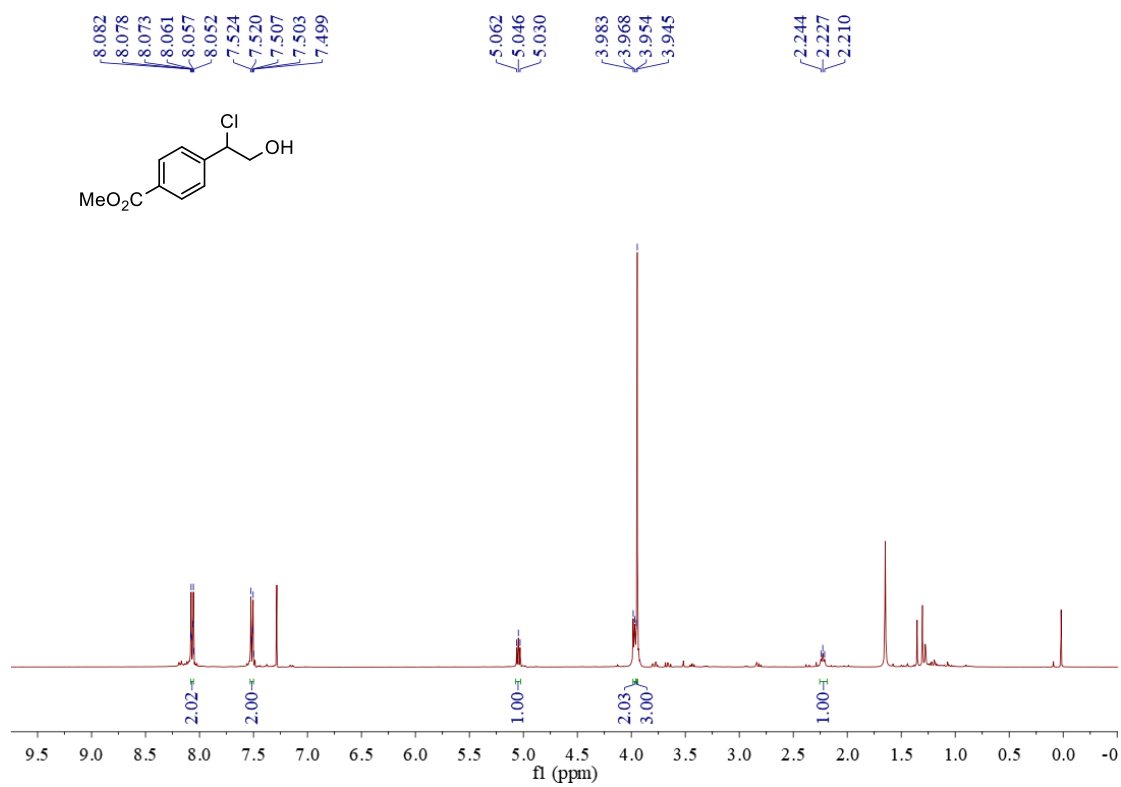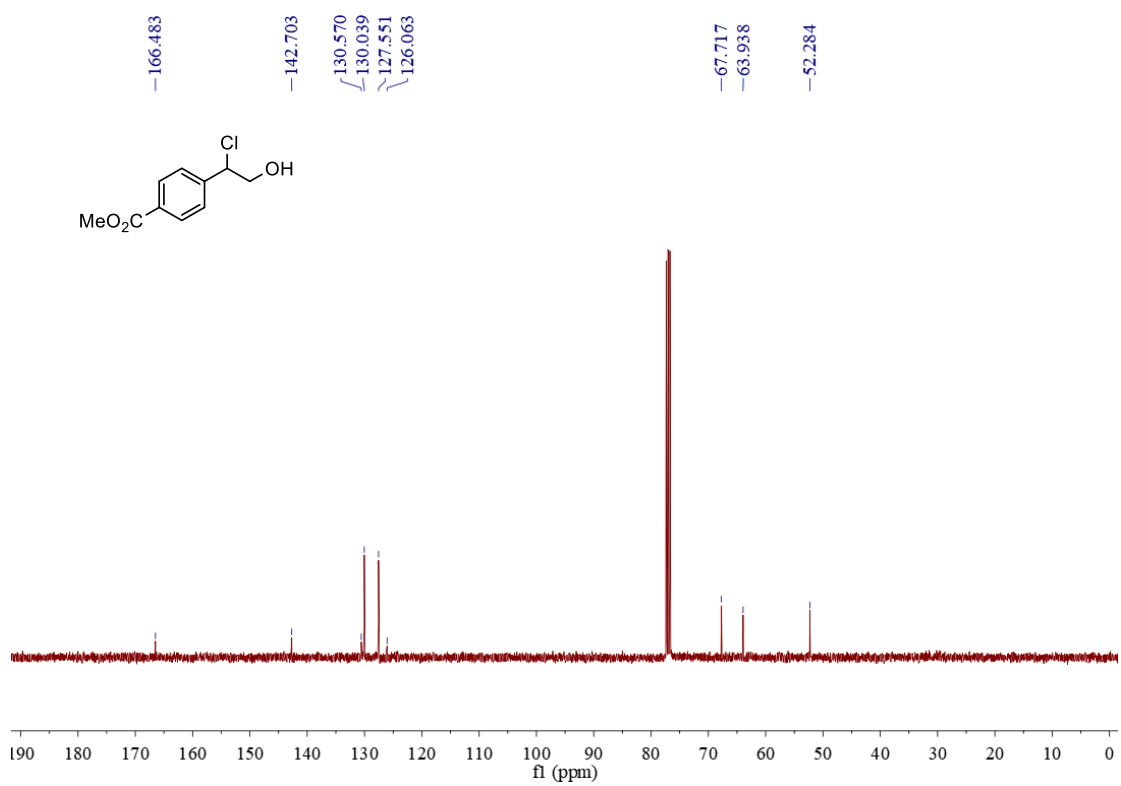

4j

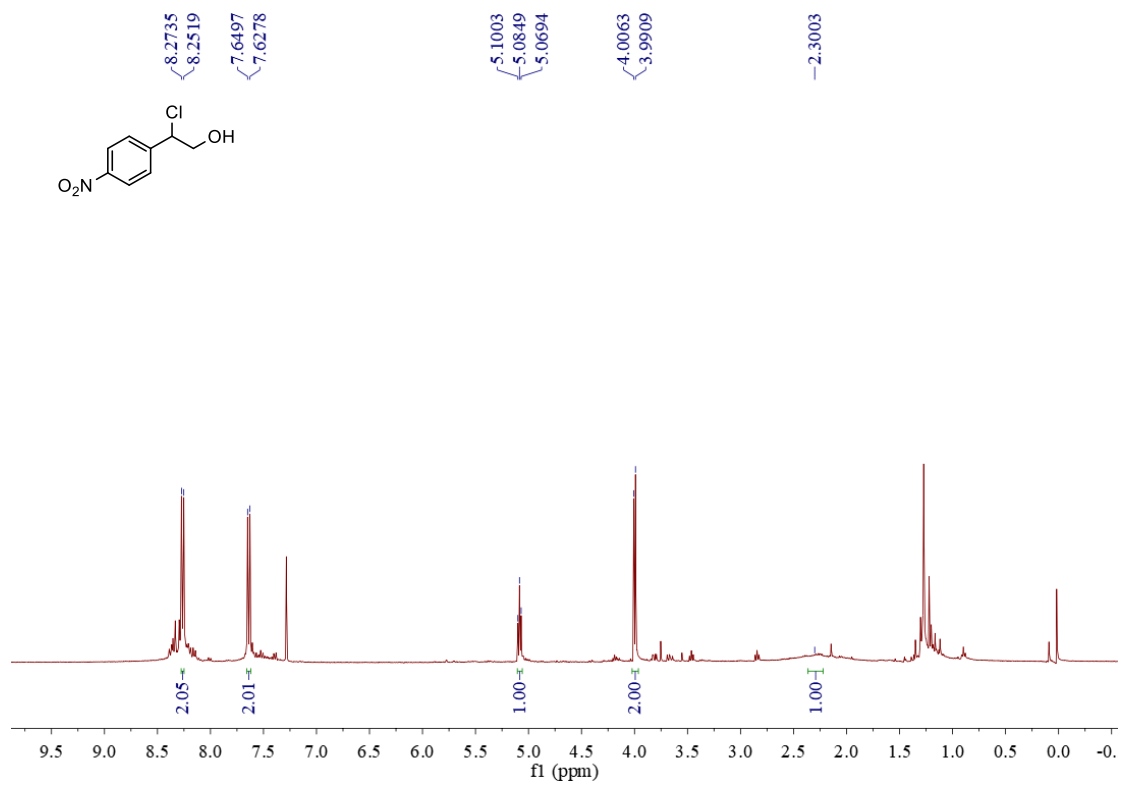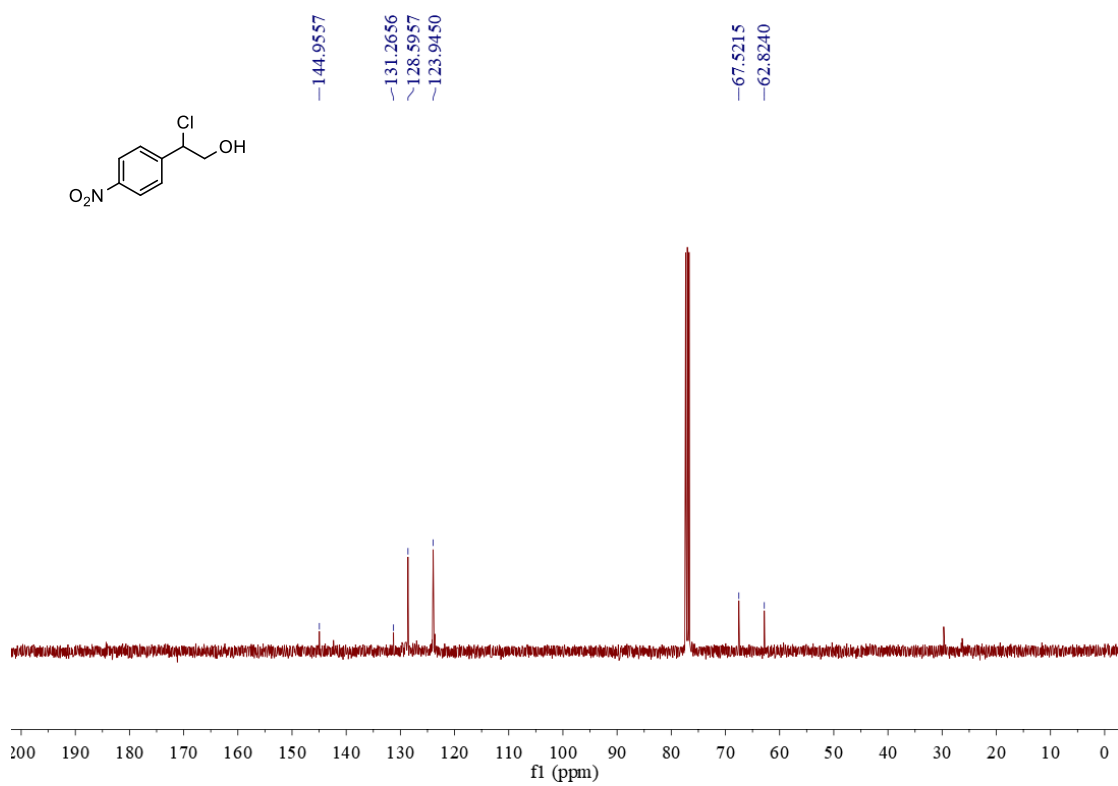

4k

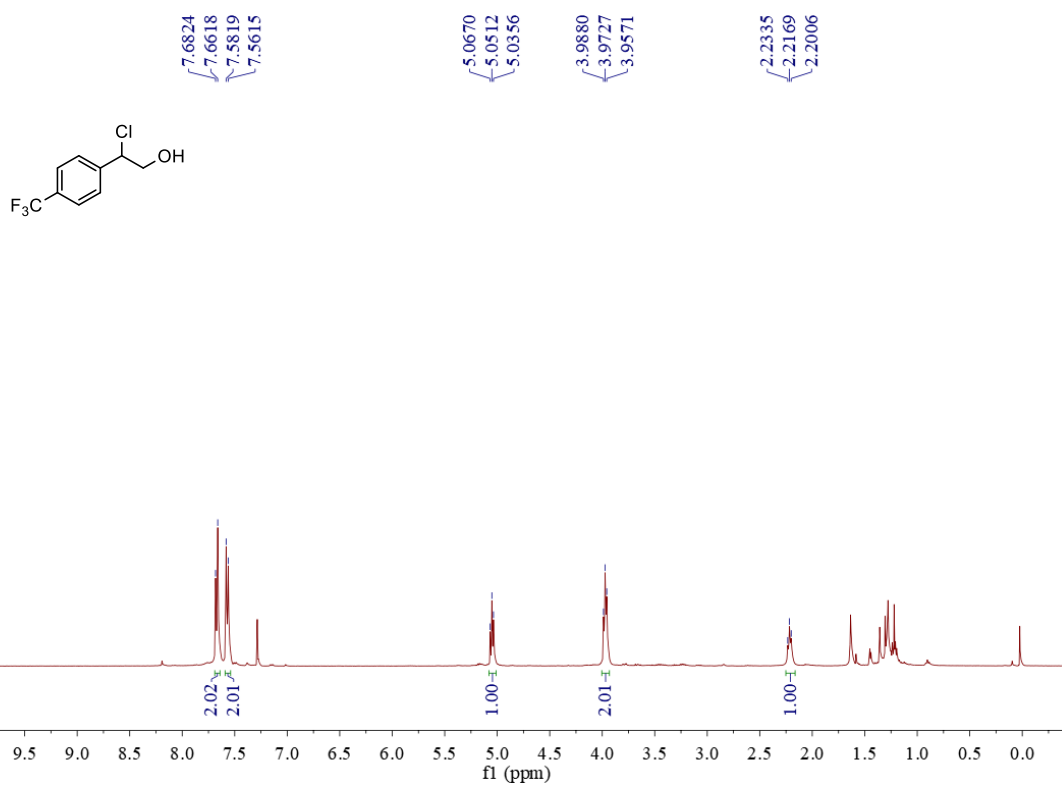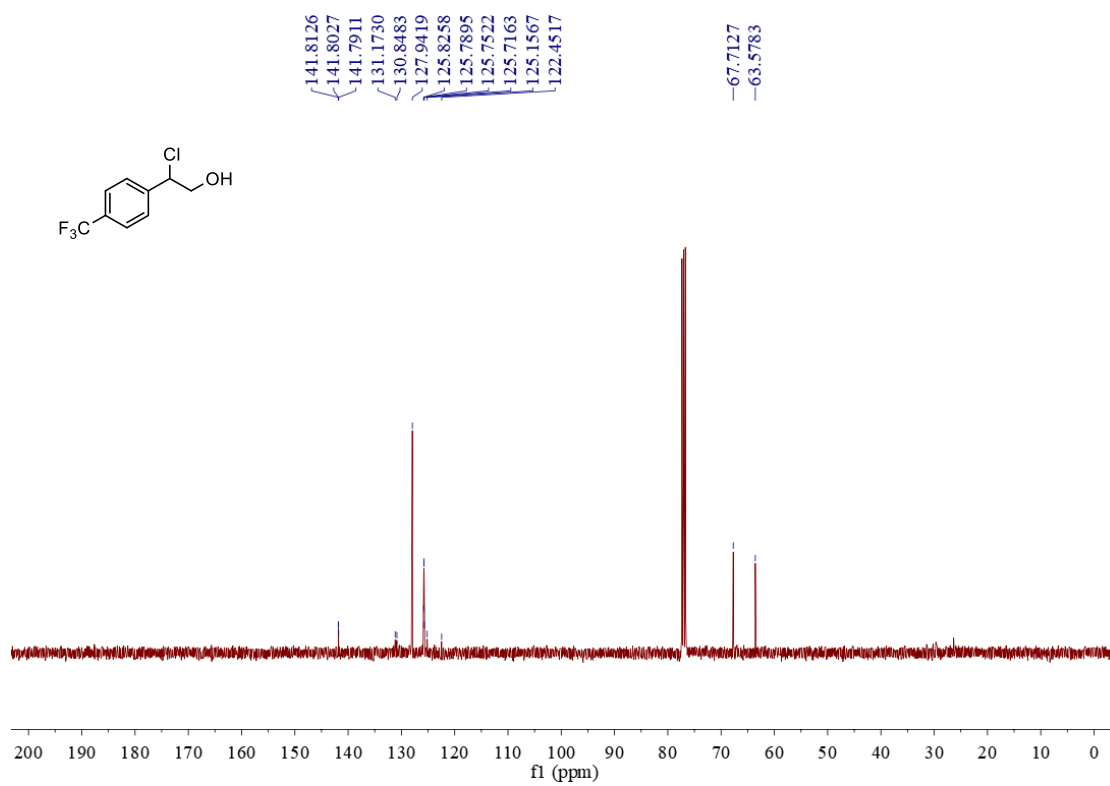

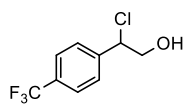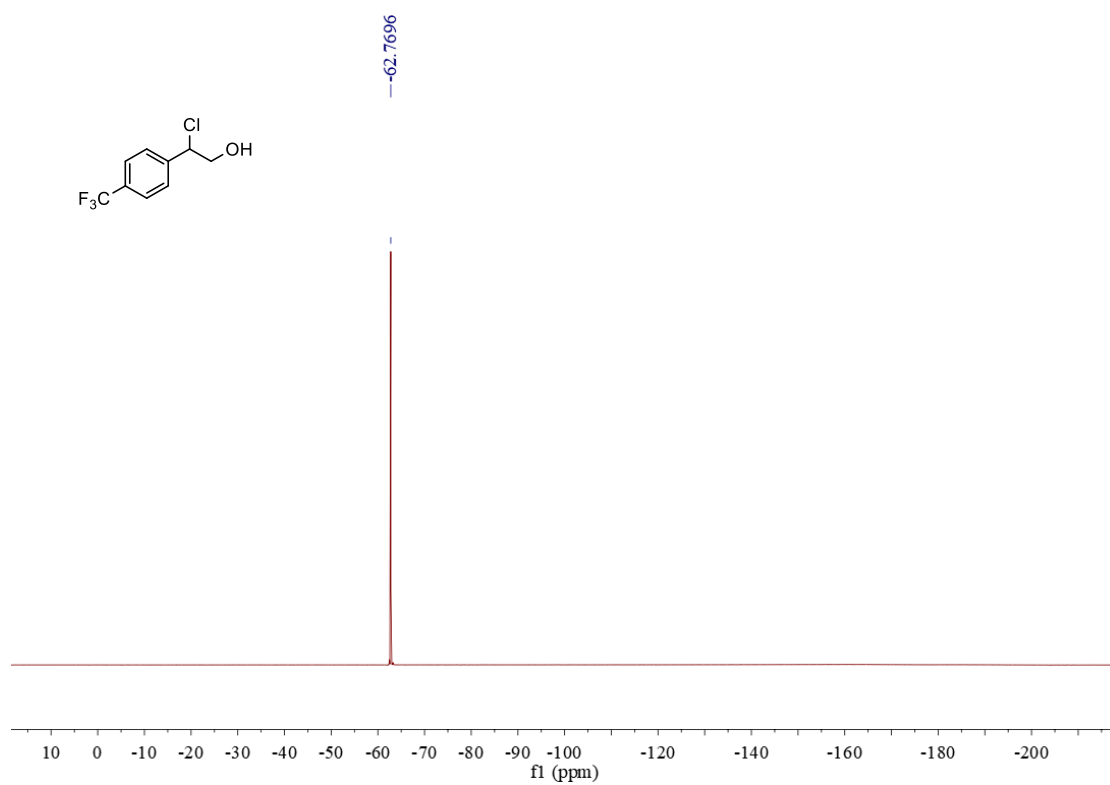

4l

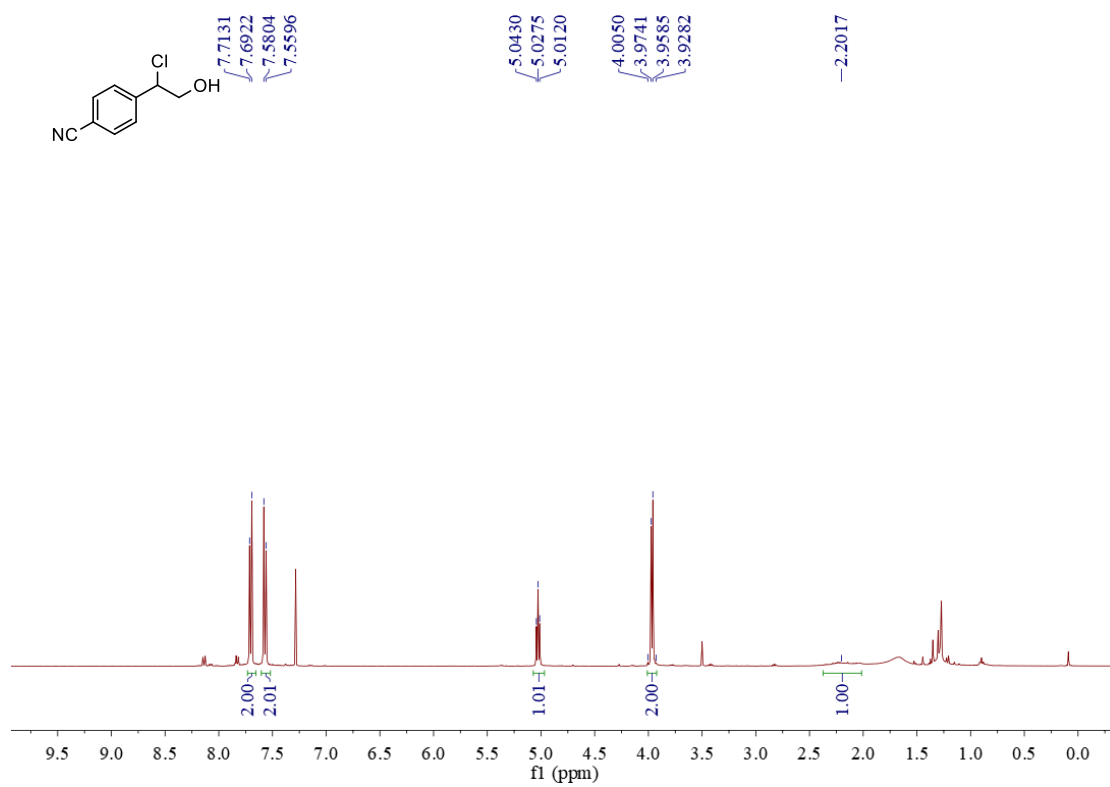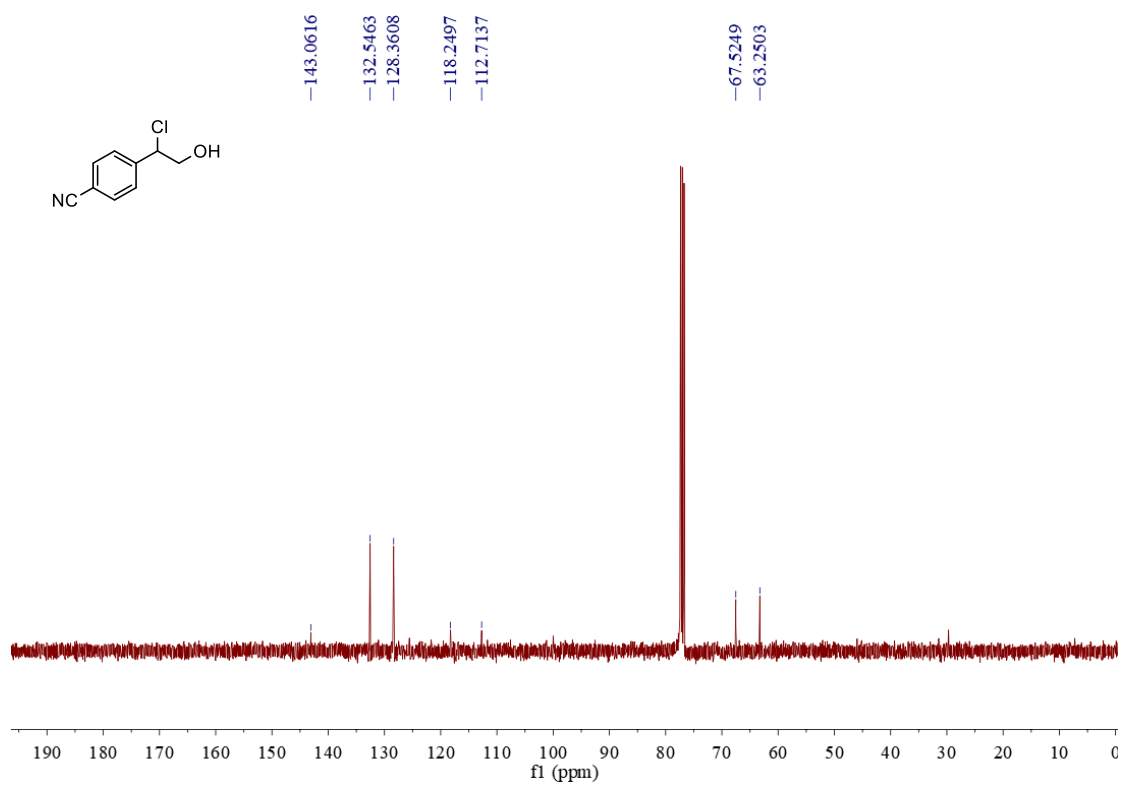

4m

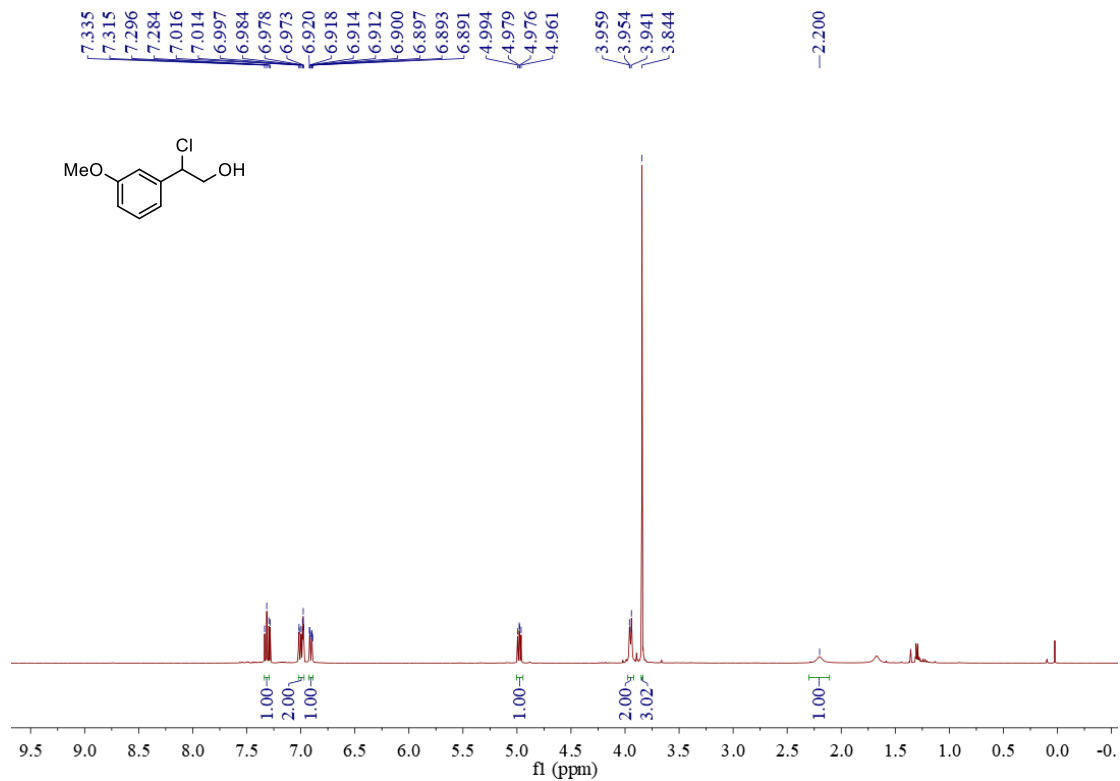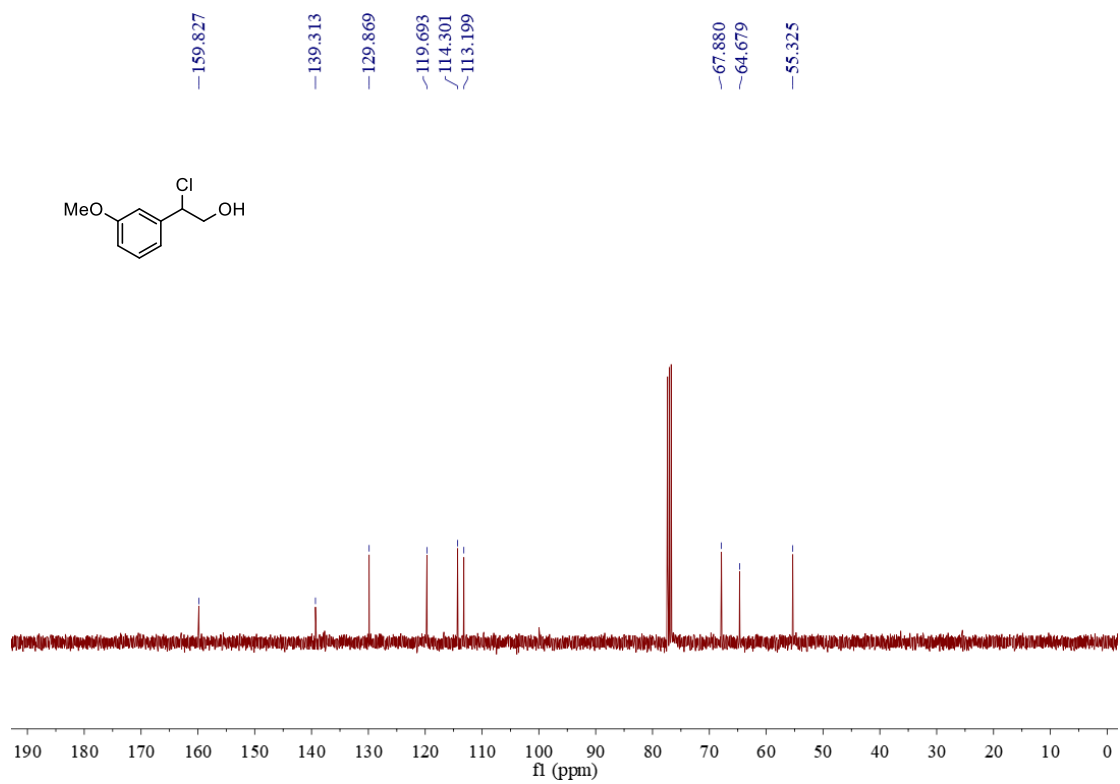

4n

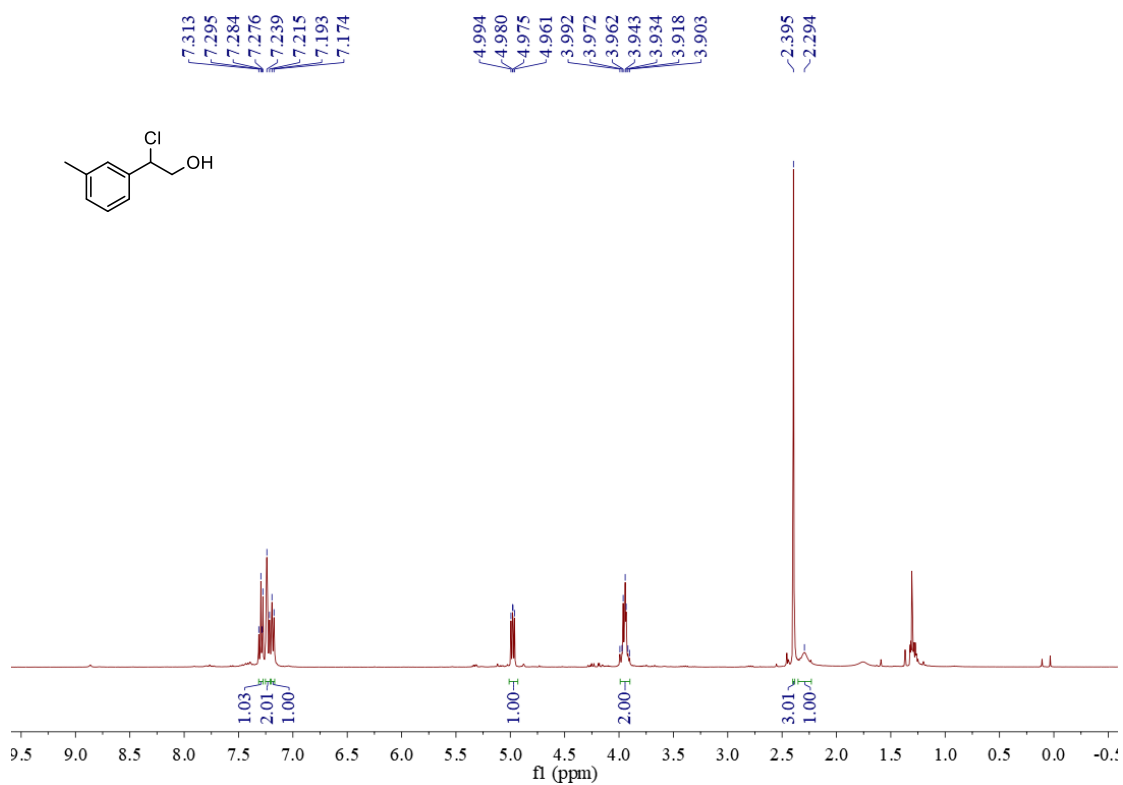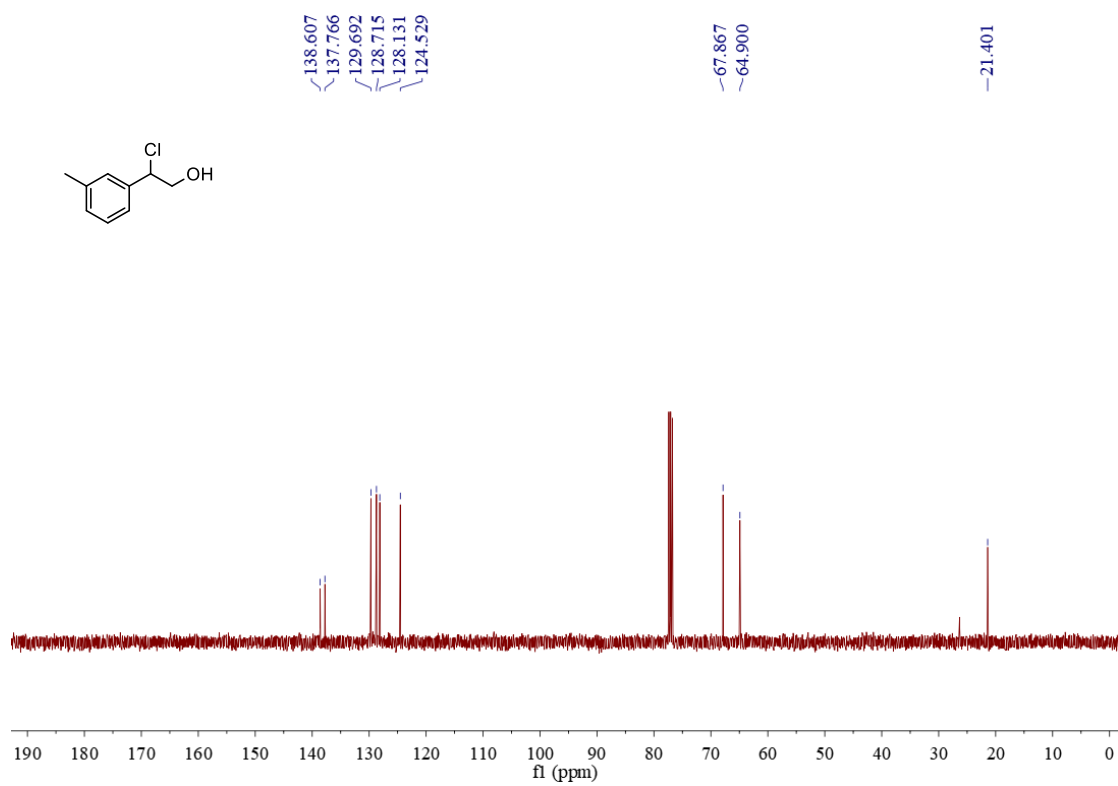

40

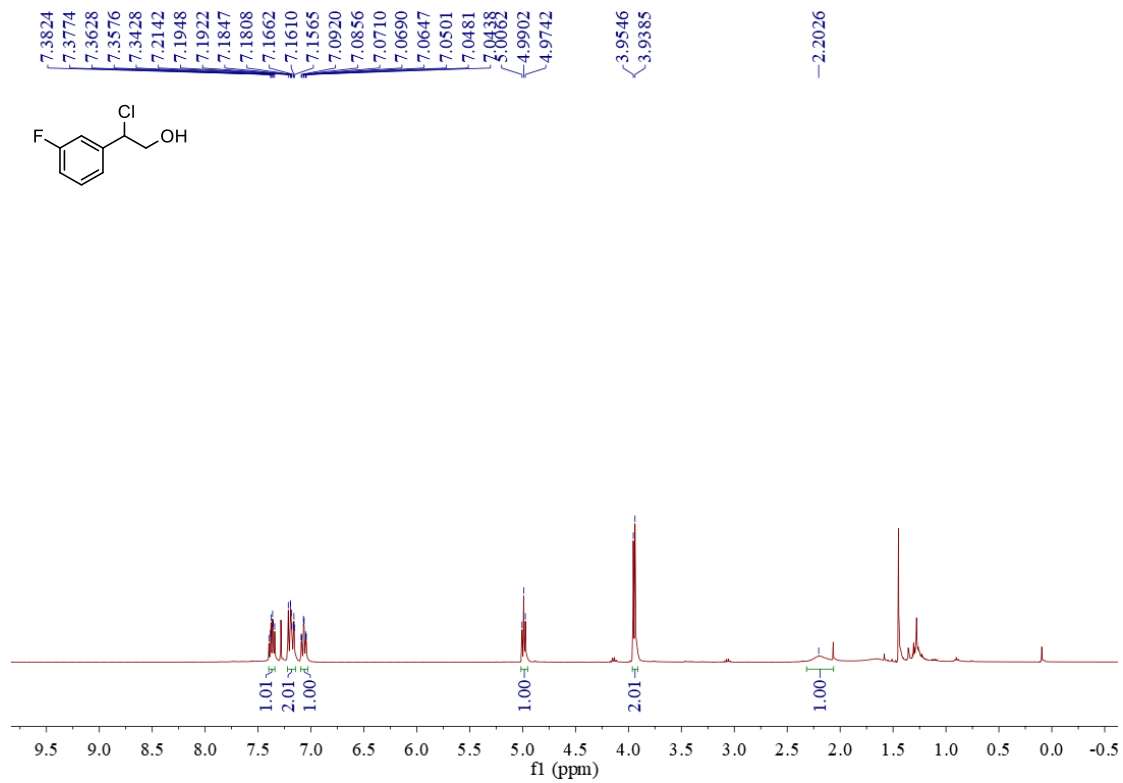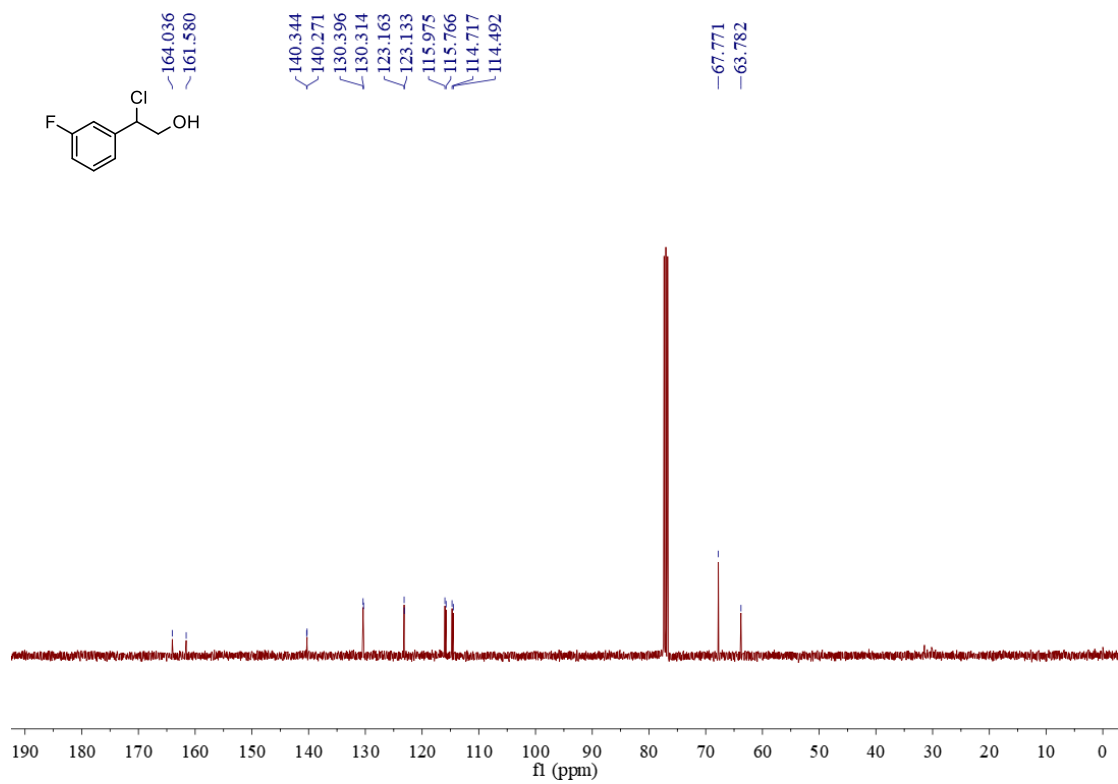

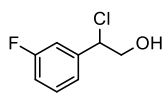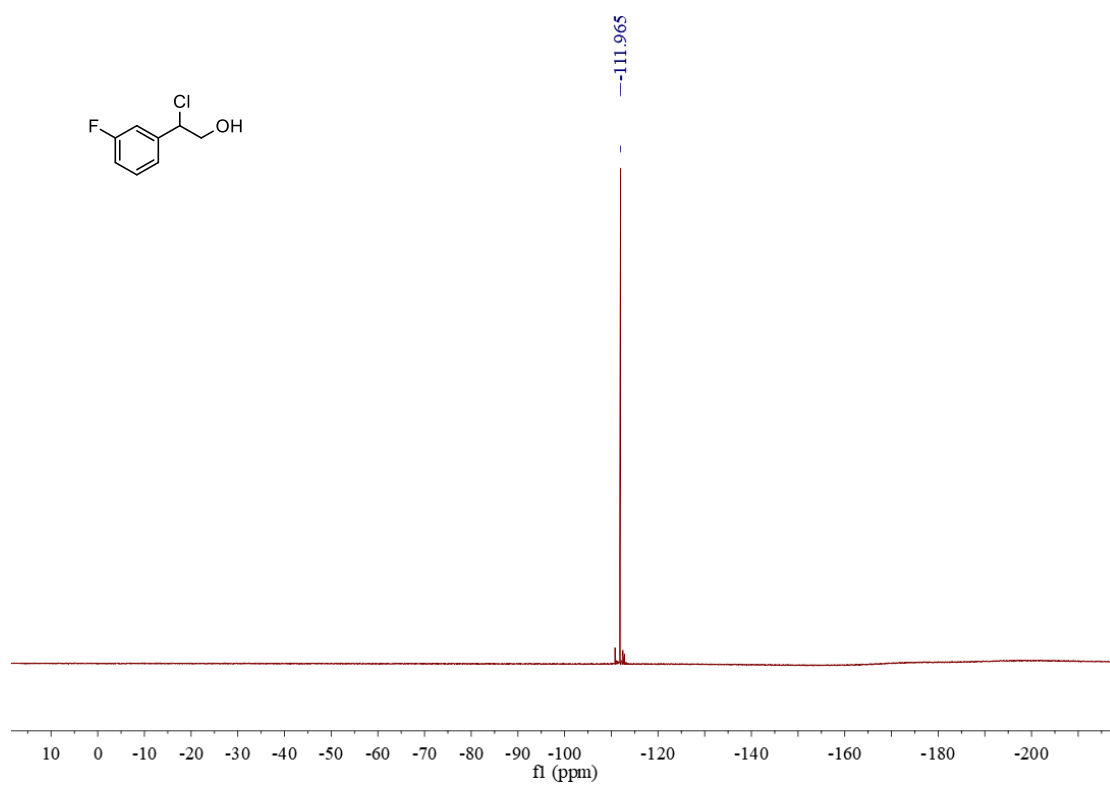

4p

7.448  
7.445  
7.441  
7.361  
7.357  
7.352  
7.348  
7.343  
7.339  
7.336  
7.334  
7.329  
7.324  
7.319  
7.315  
7.309  
7.306  
7.299  
7.296  
7.284  
4.979  
4.963  
4.947  
3.951  
3.935  
-2.223

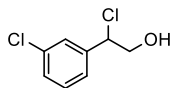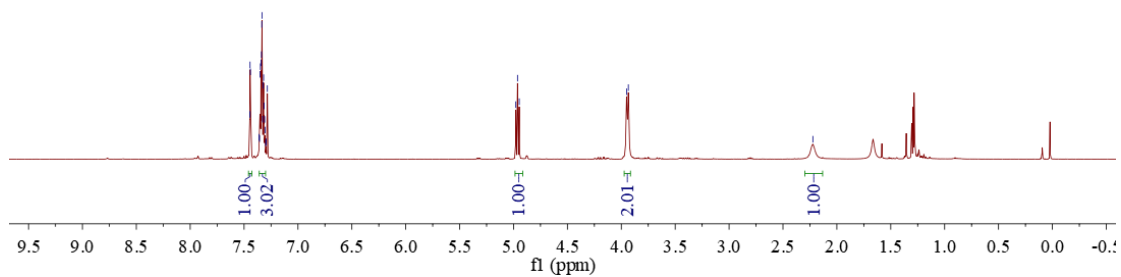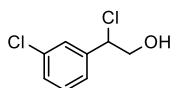

139.864  
134.679  
130.052  
129.043  
127.708  
125.686

67.732  
63.708

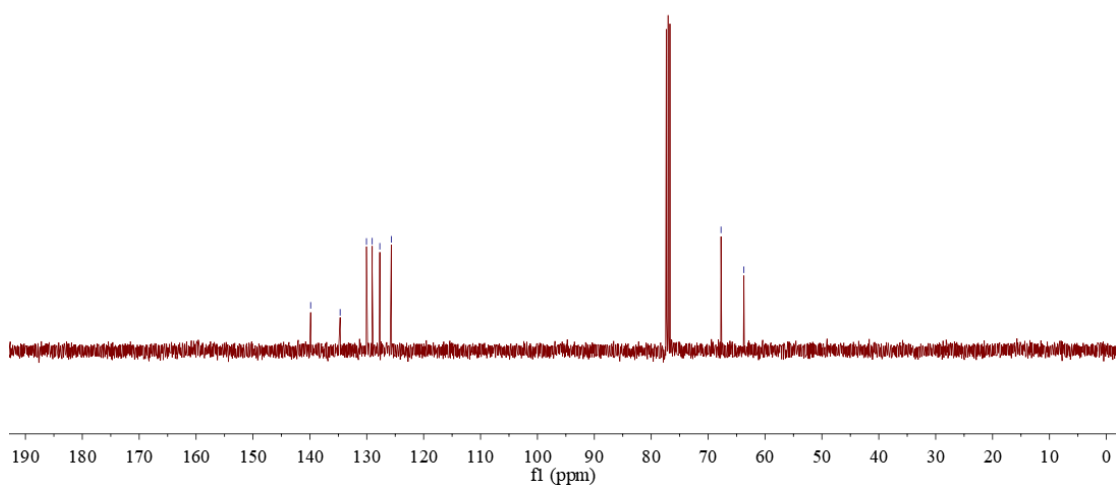

4q

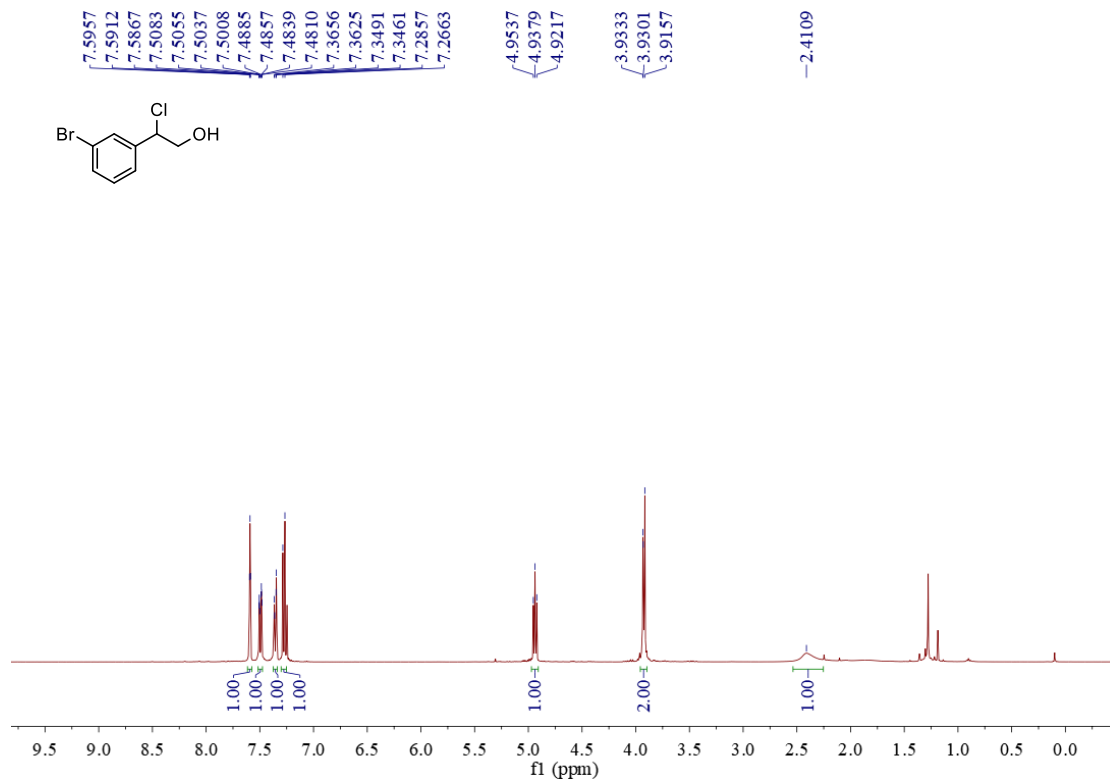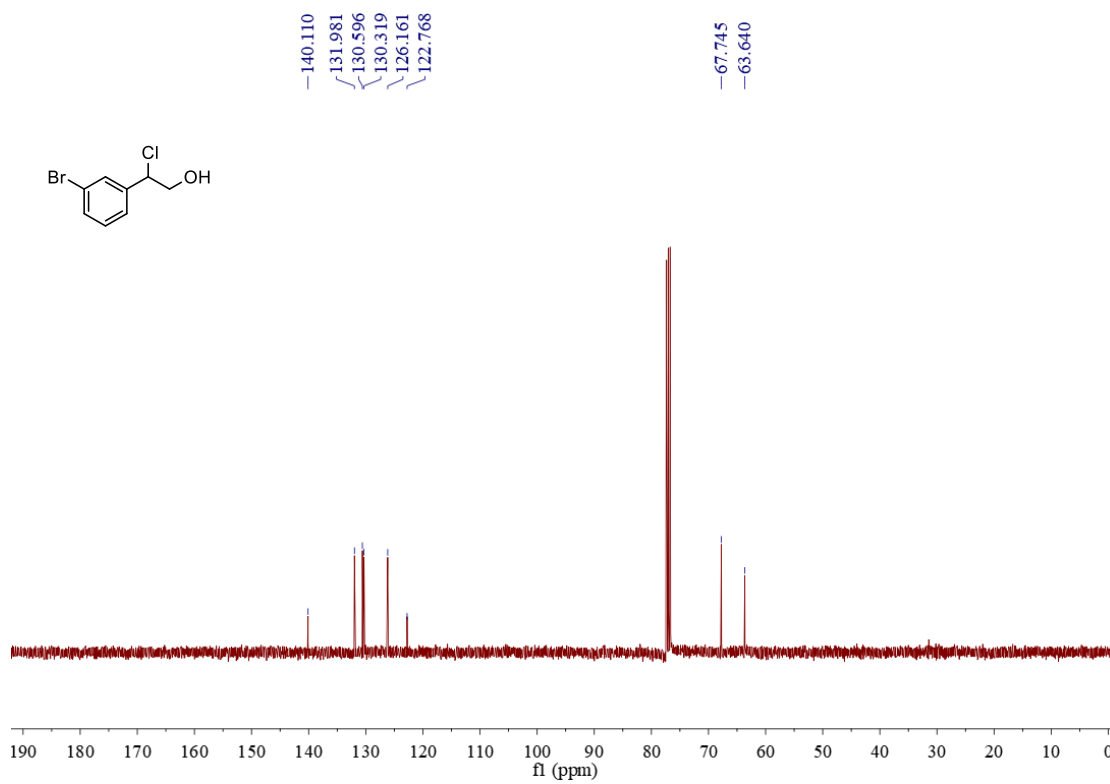

4r

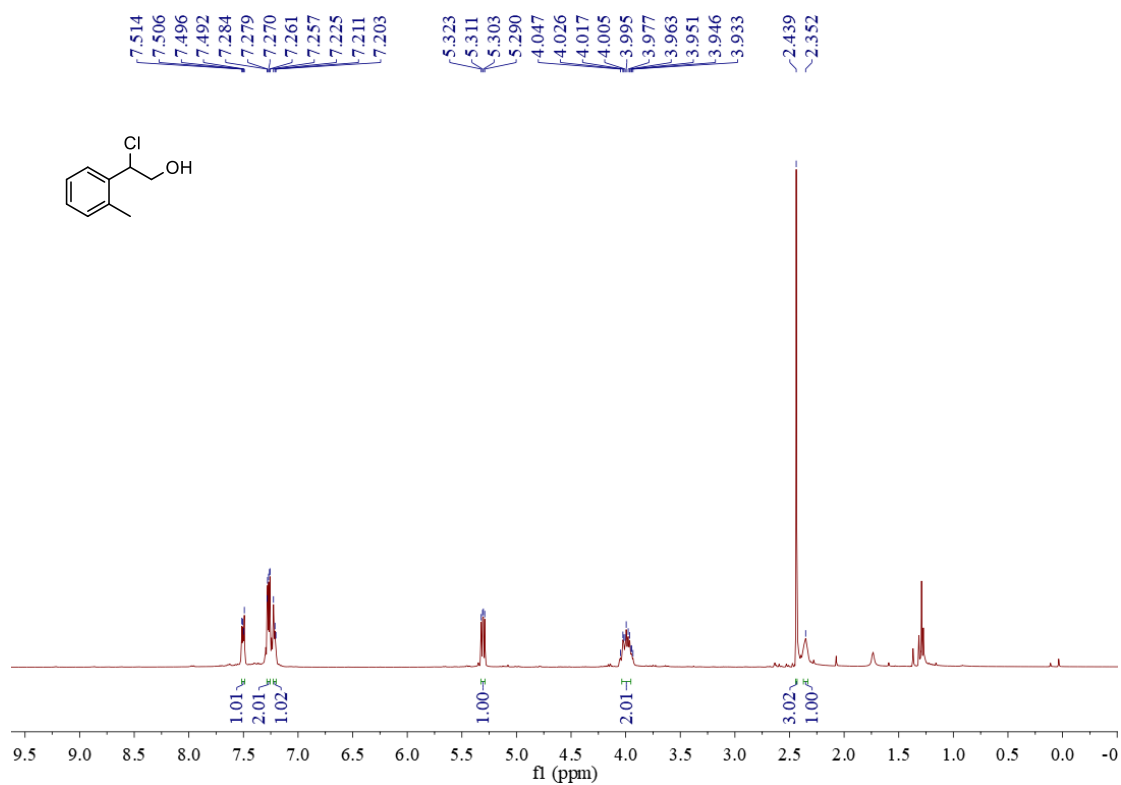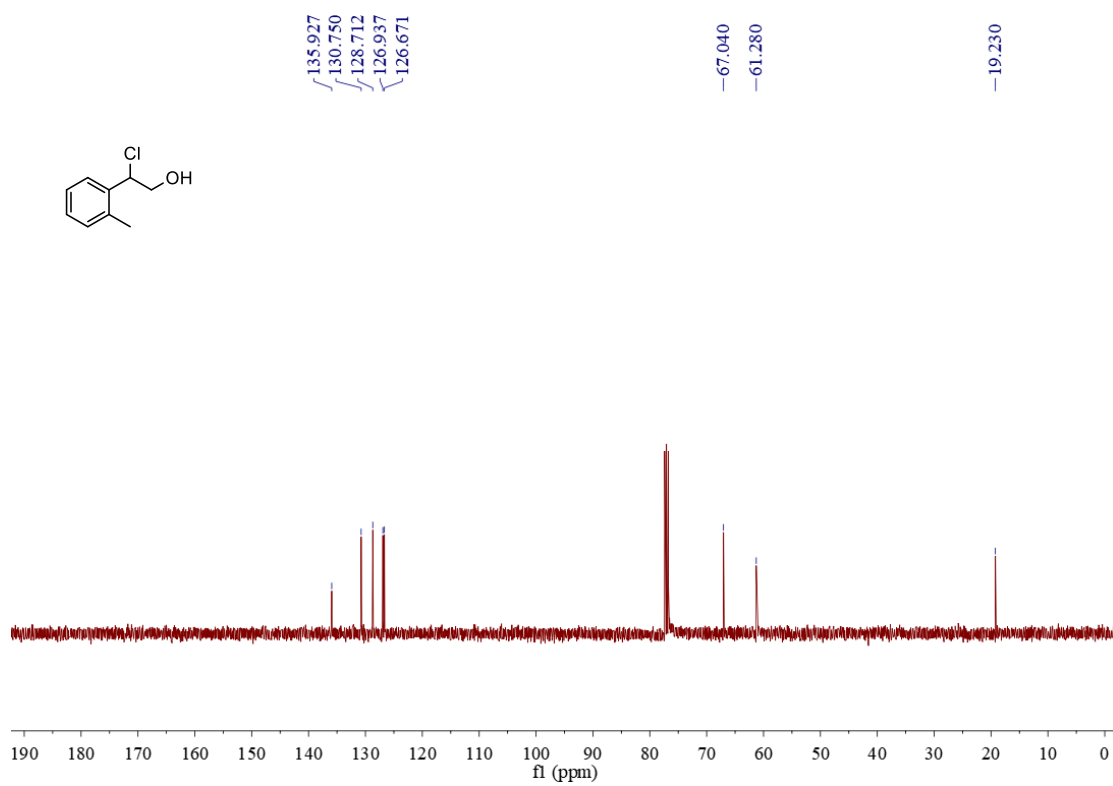

4s

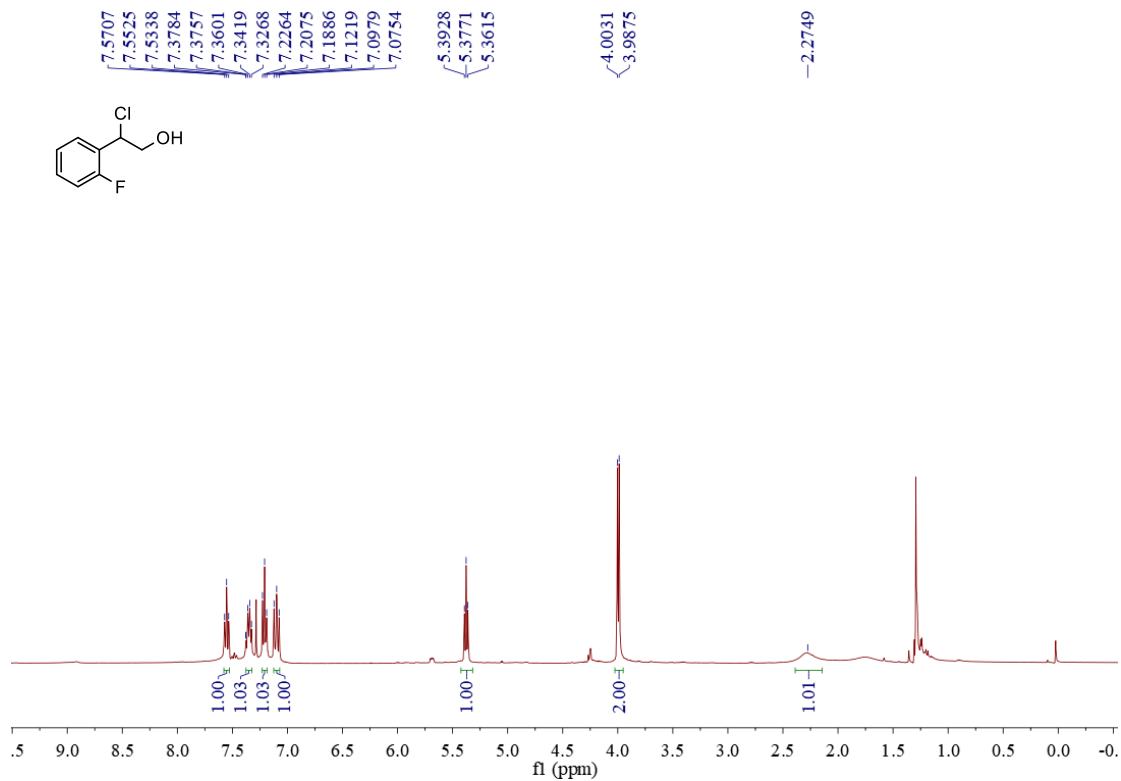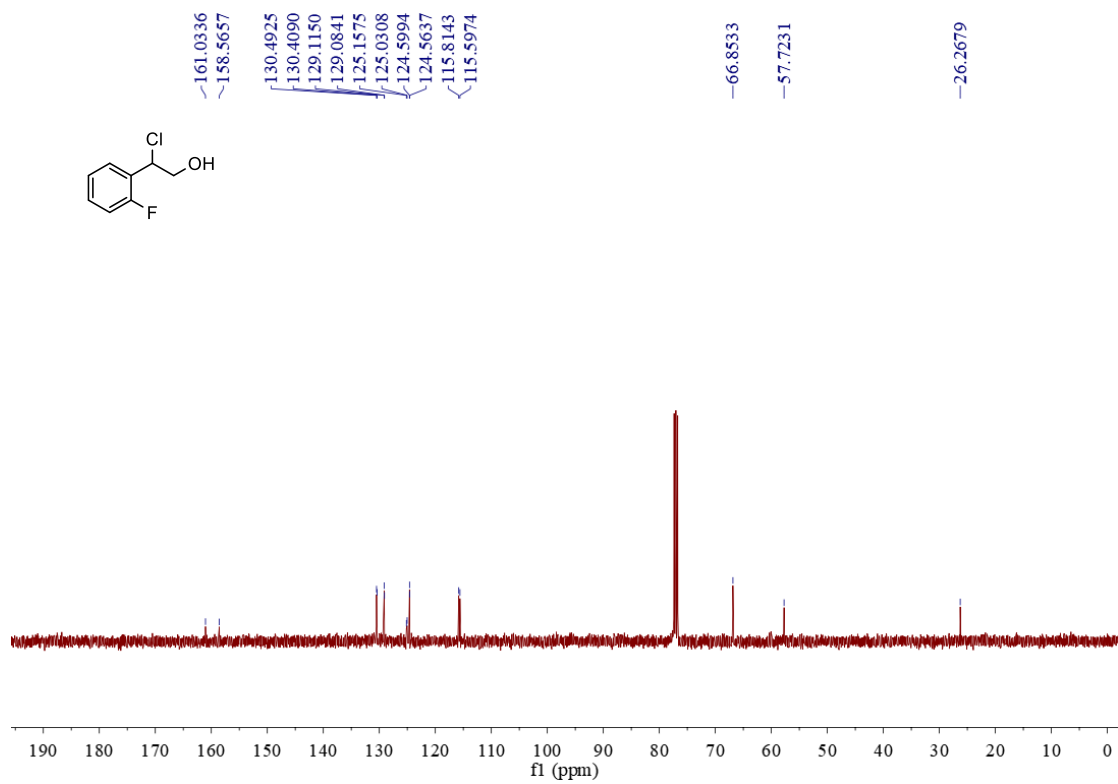

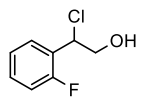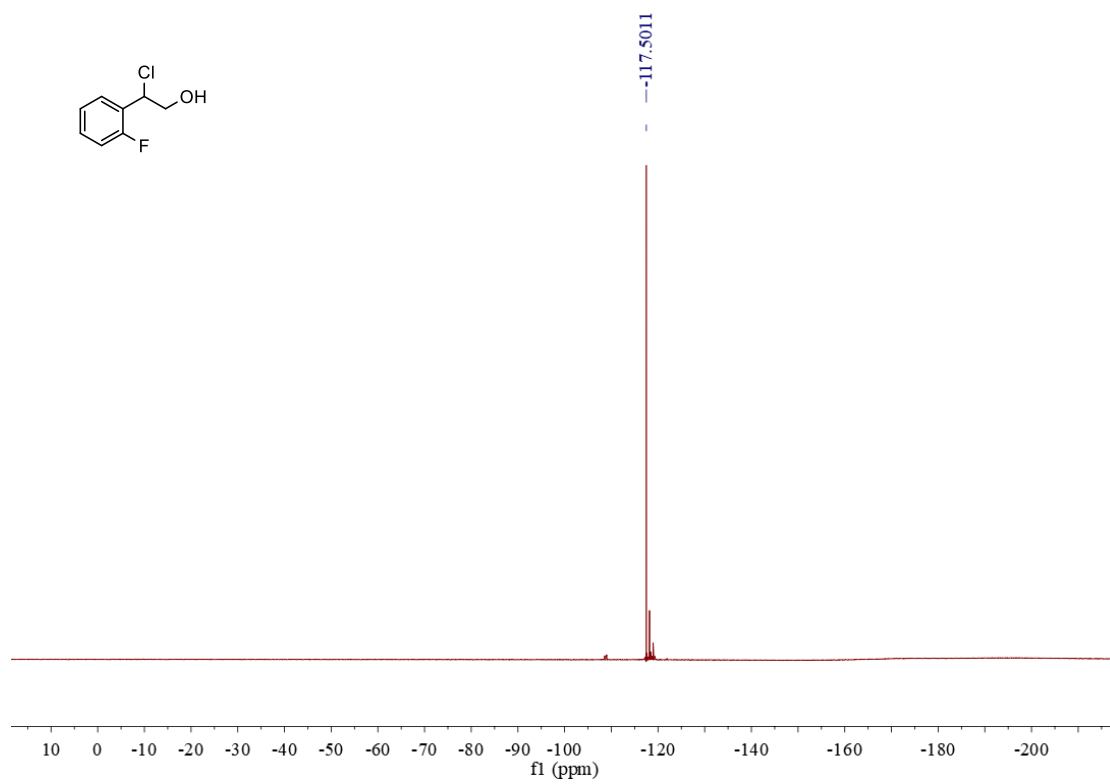

4t

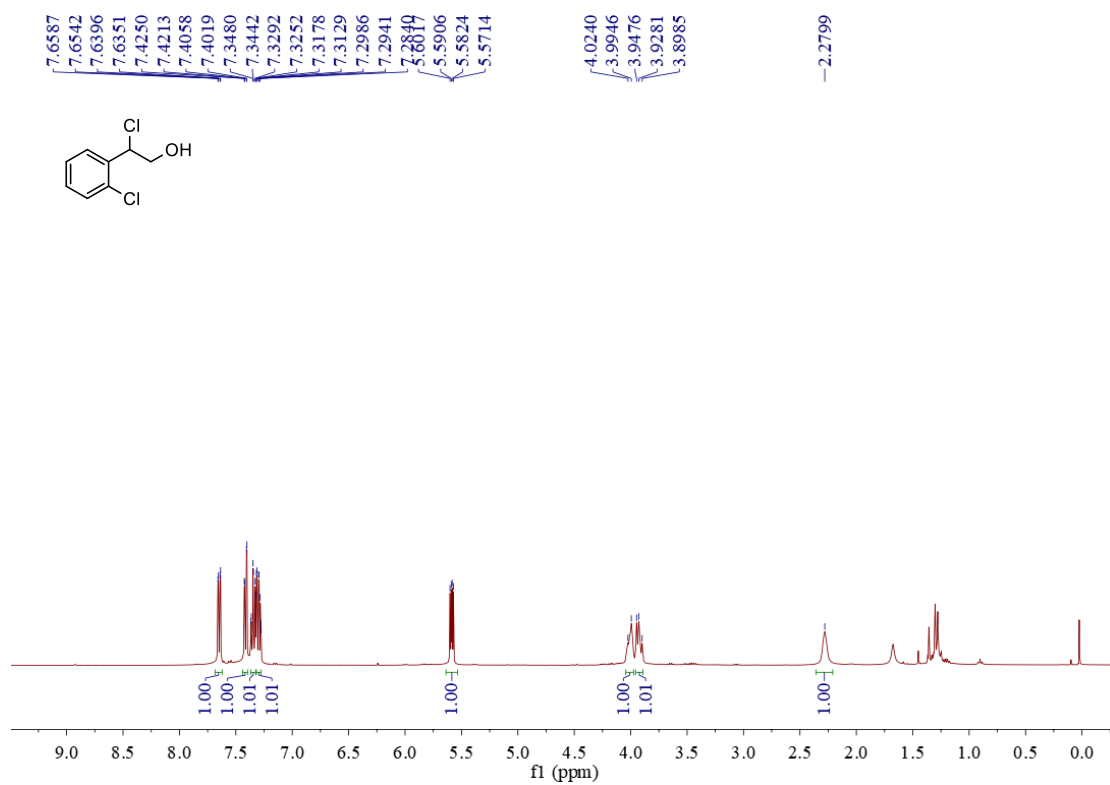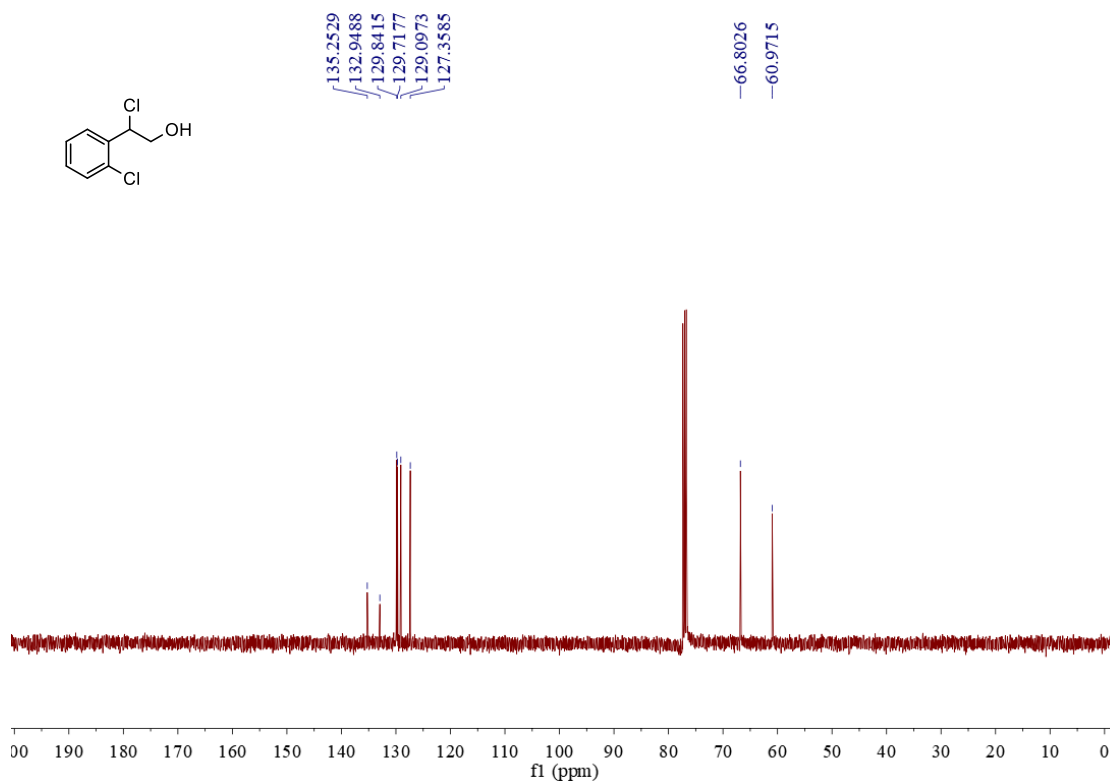

4u

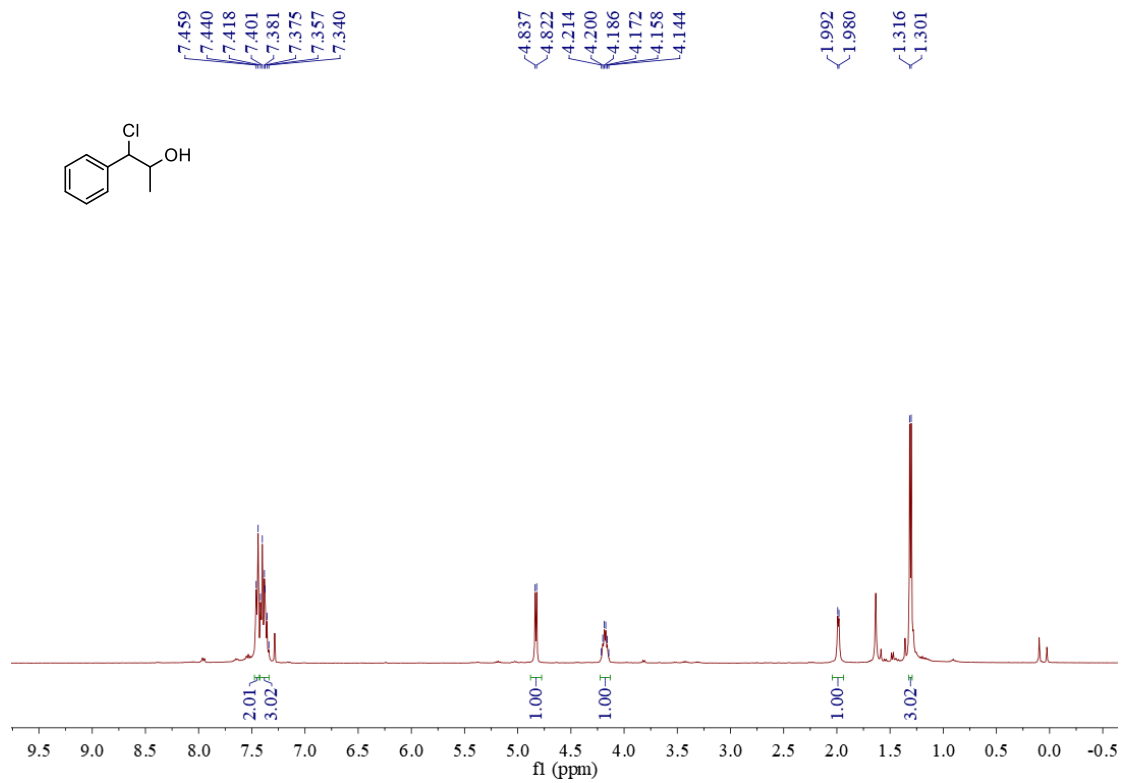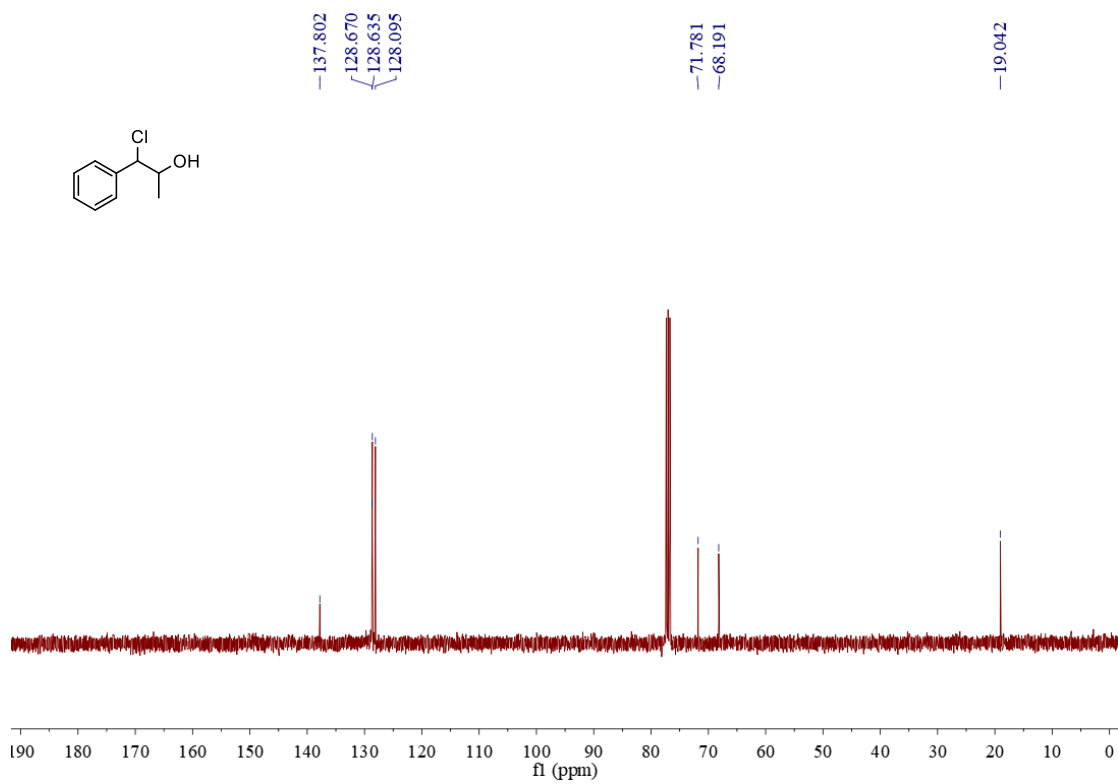

4v

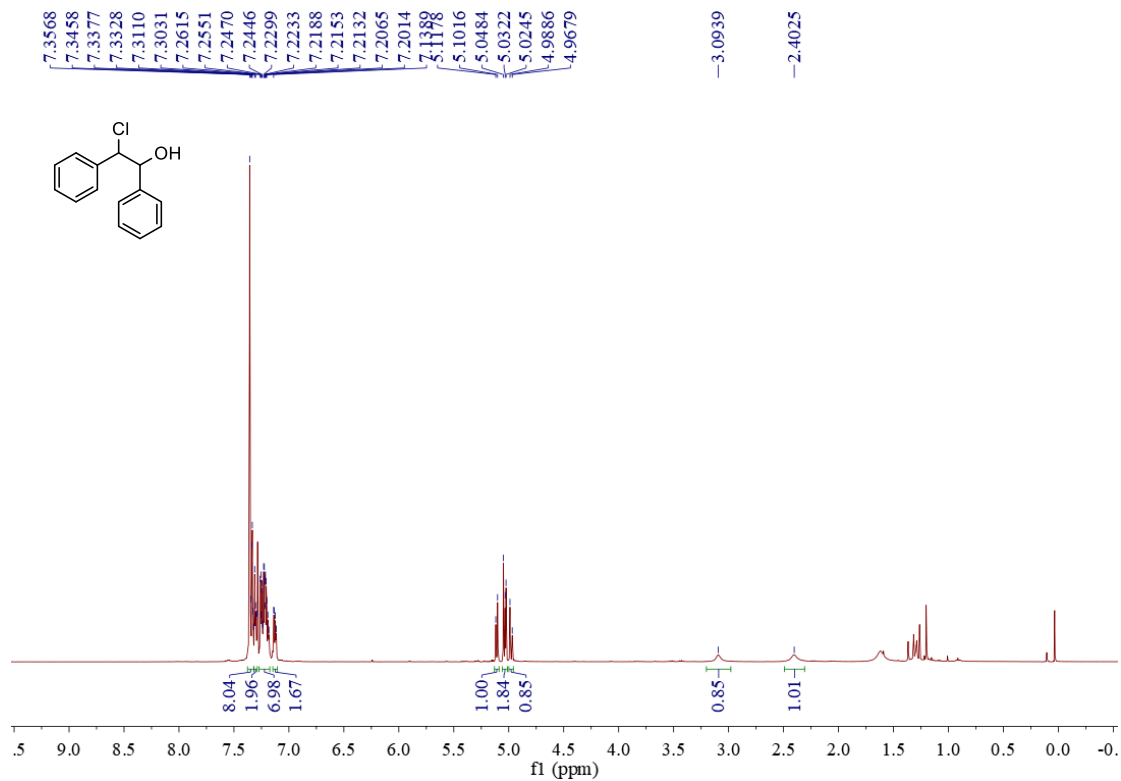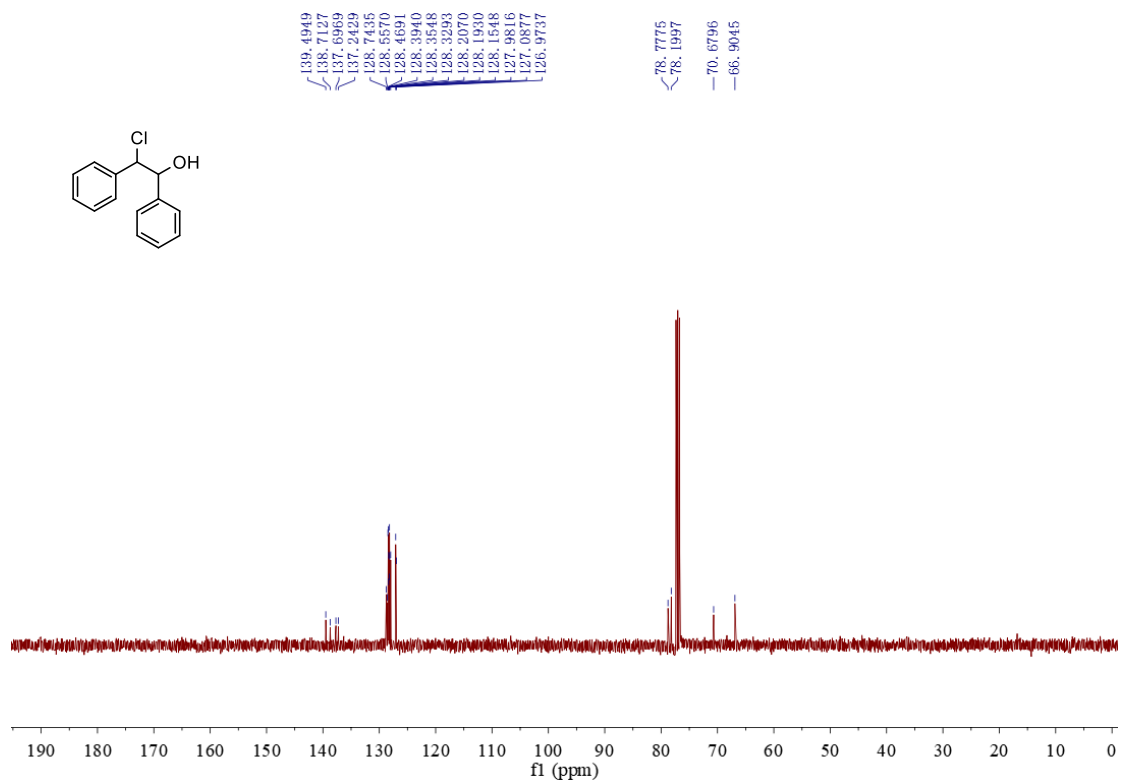

4y

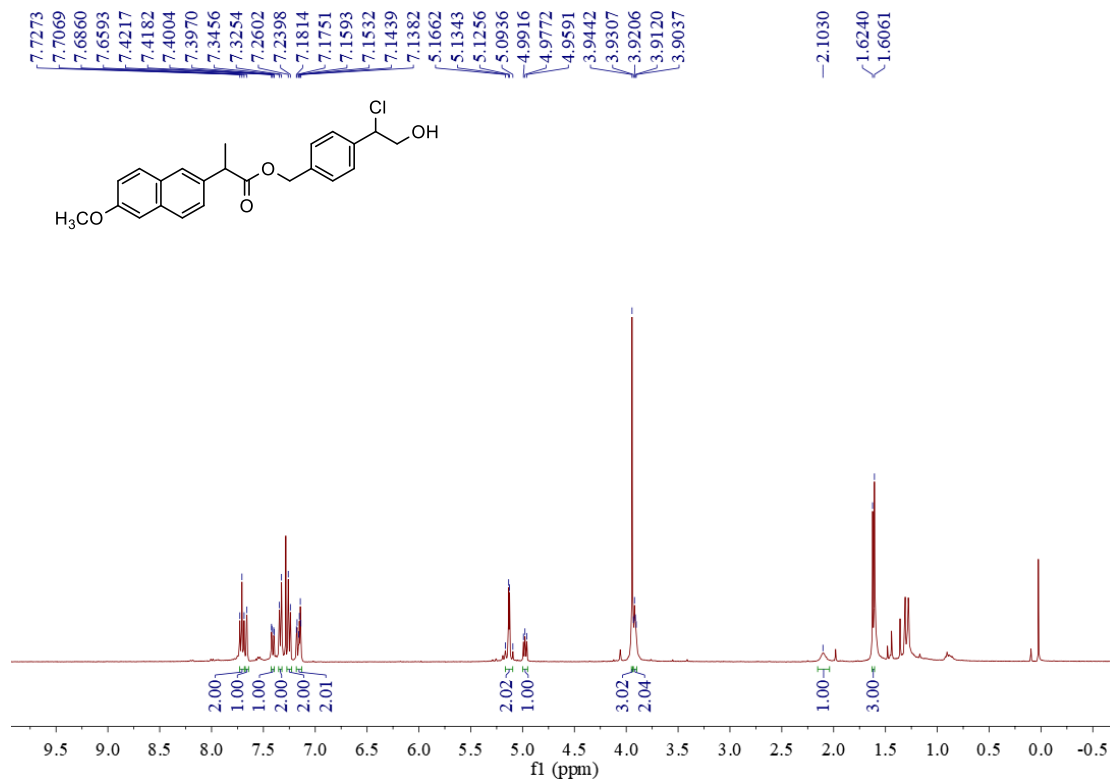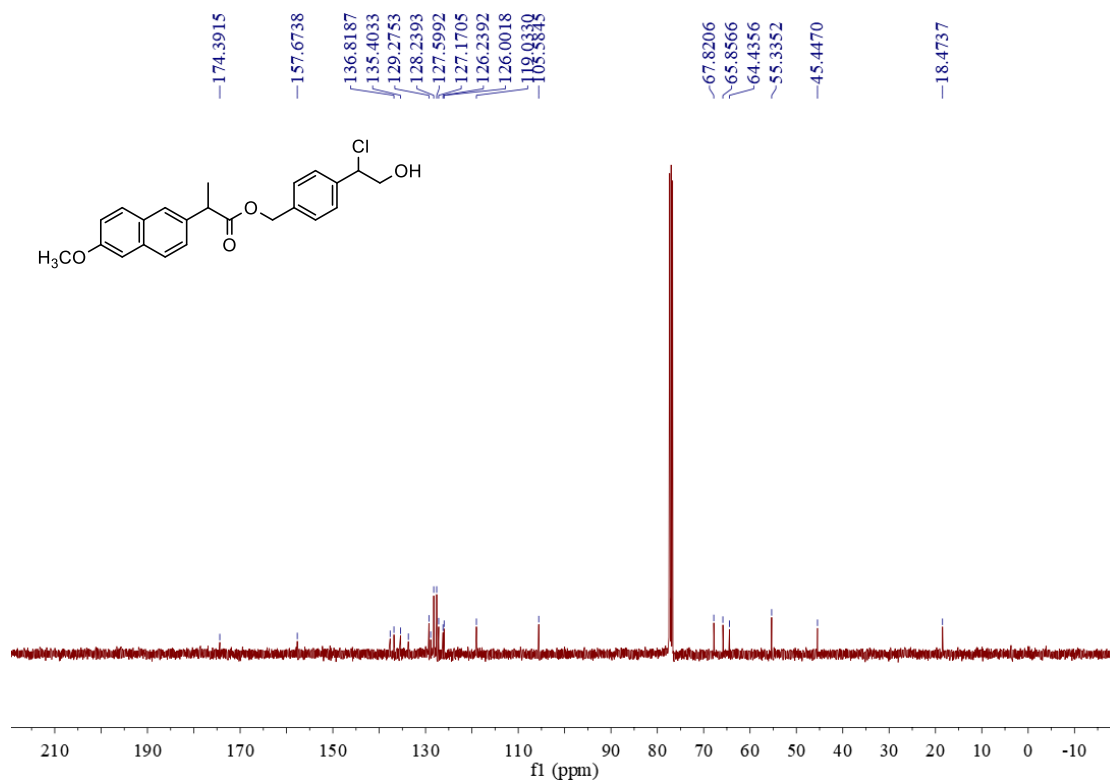

4z

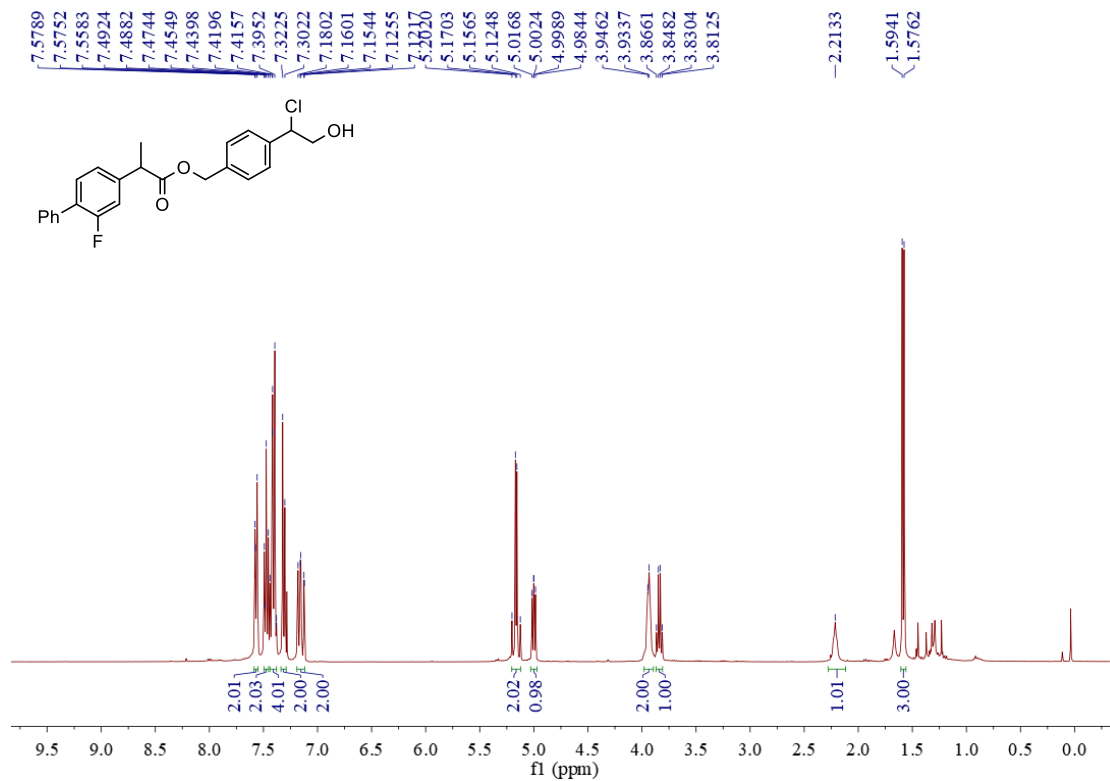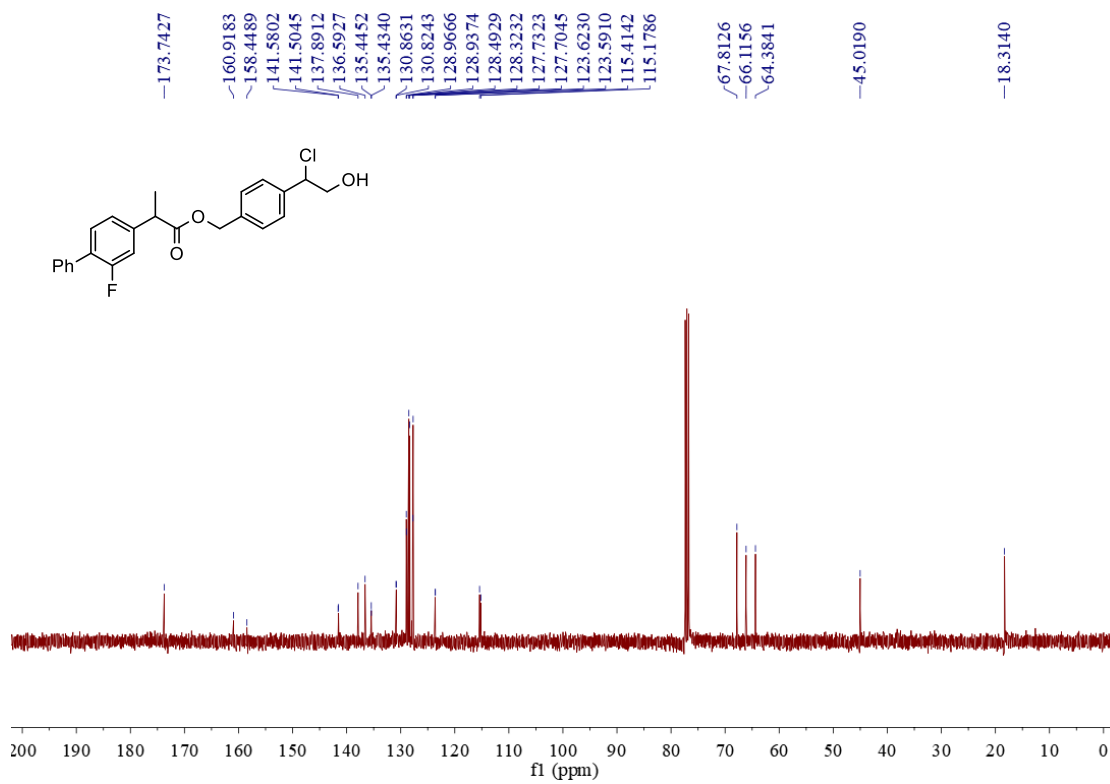



4aa

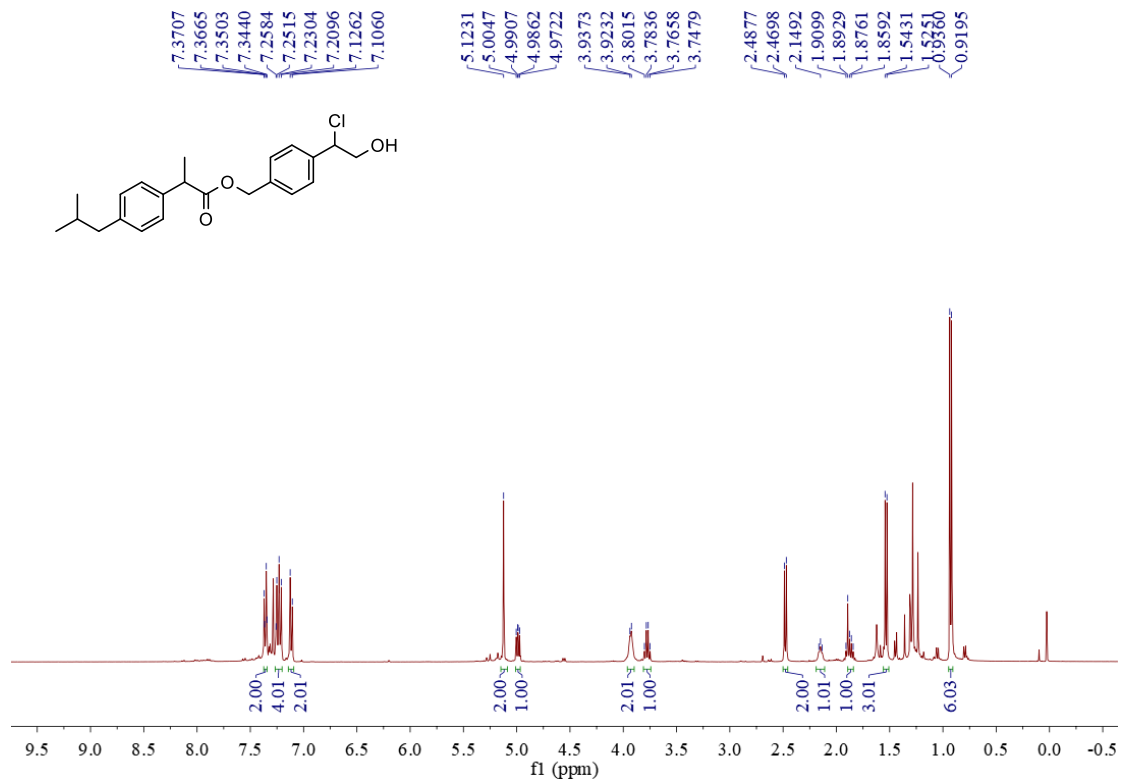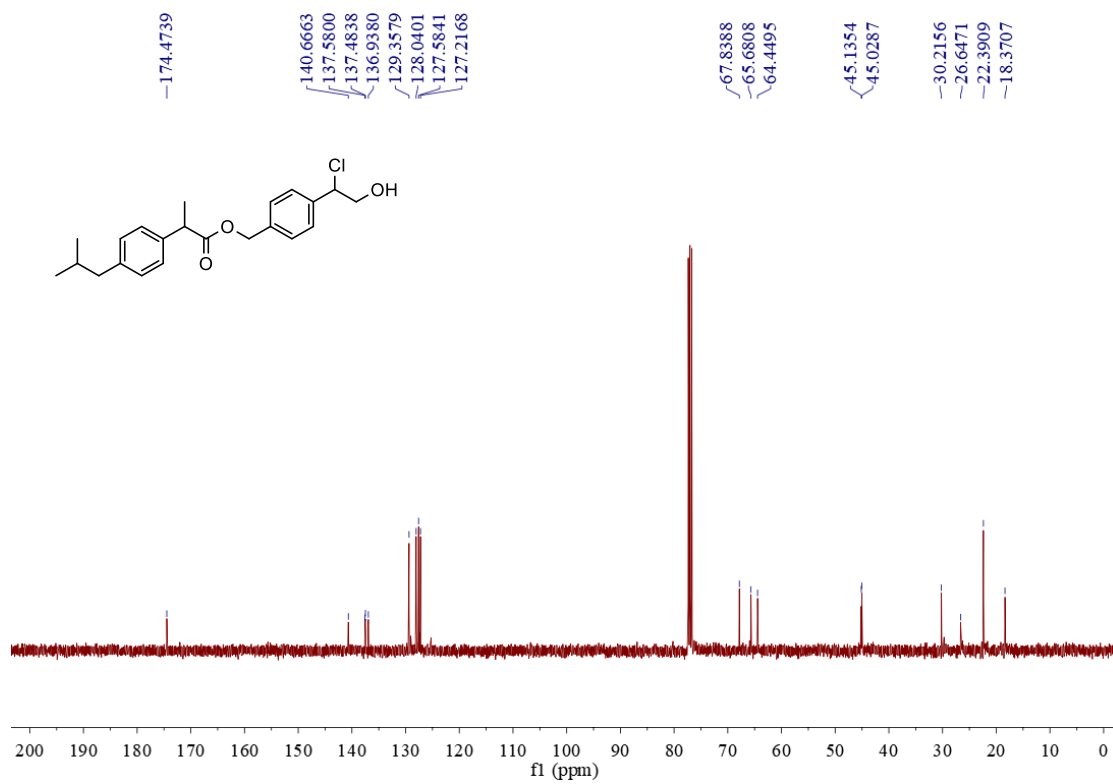

5

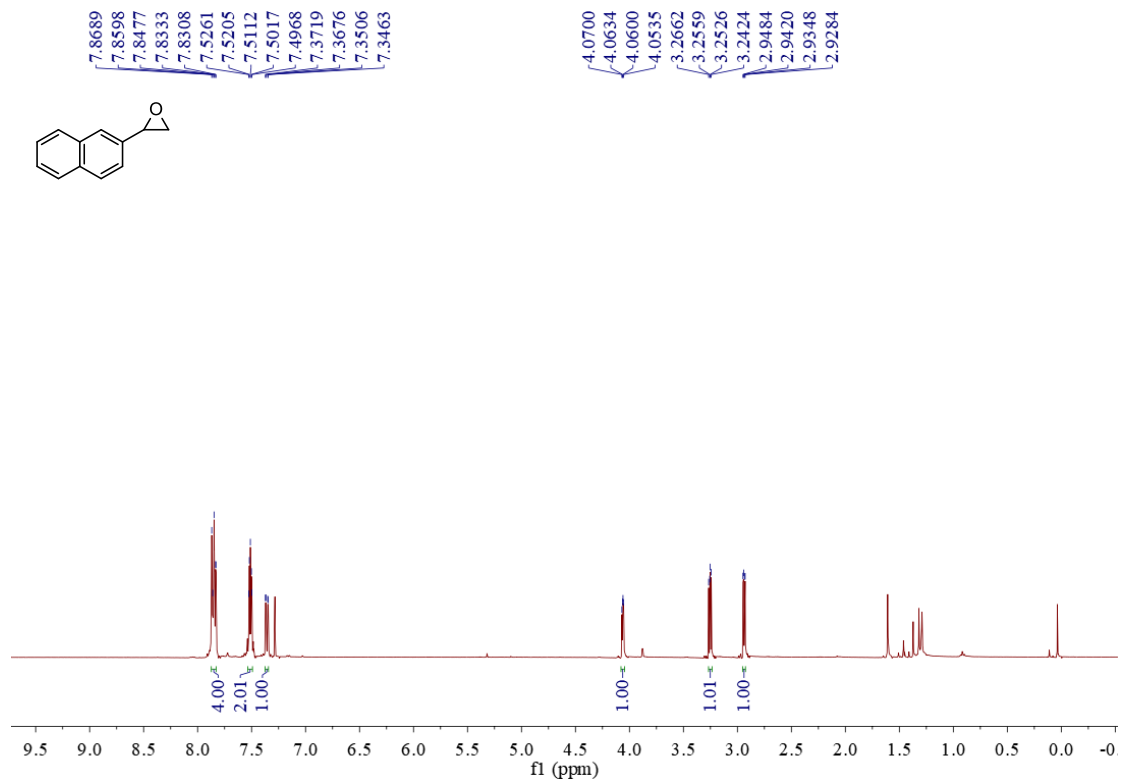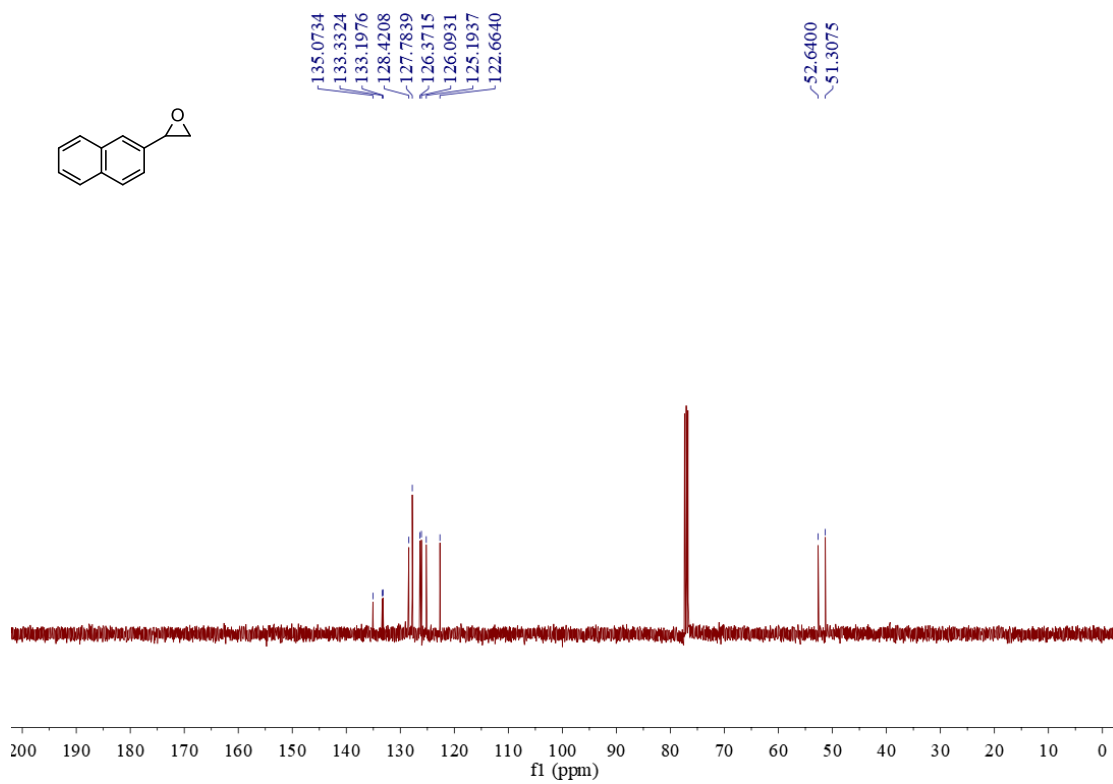

6

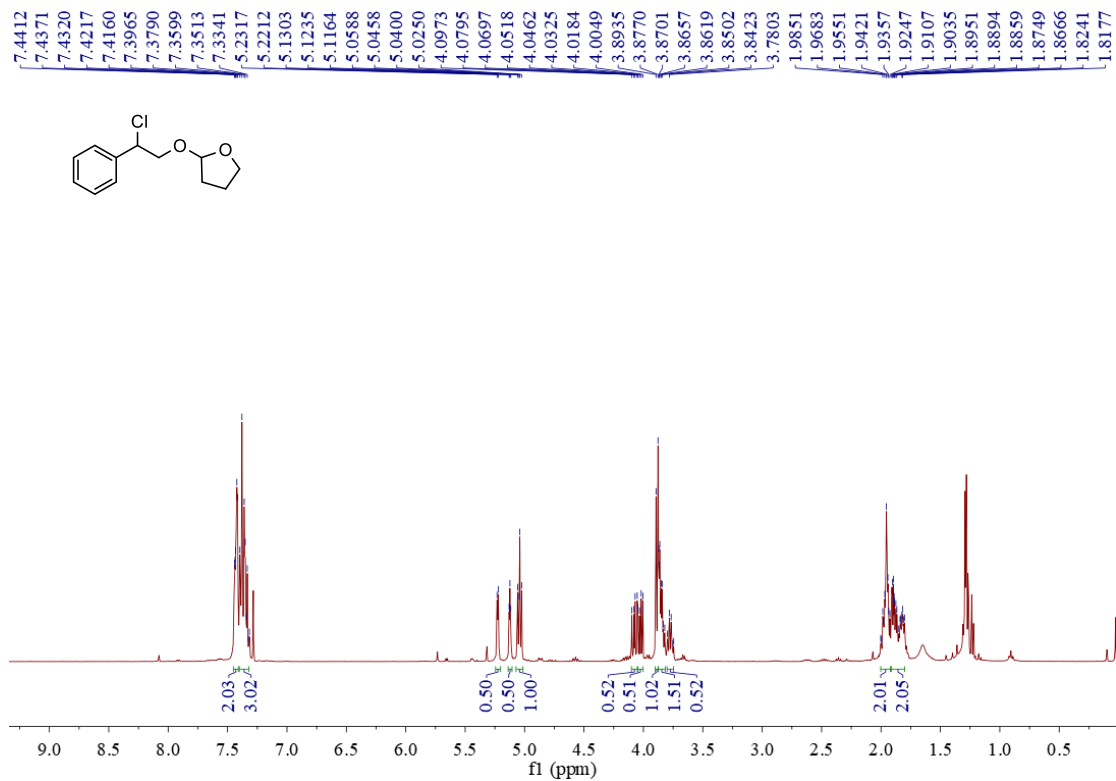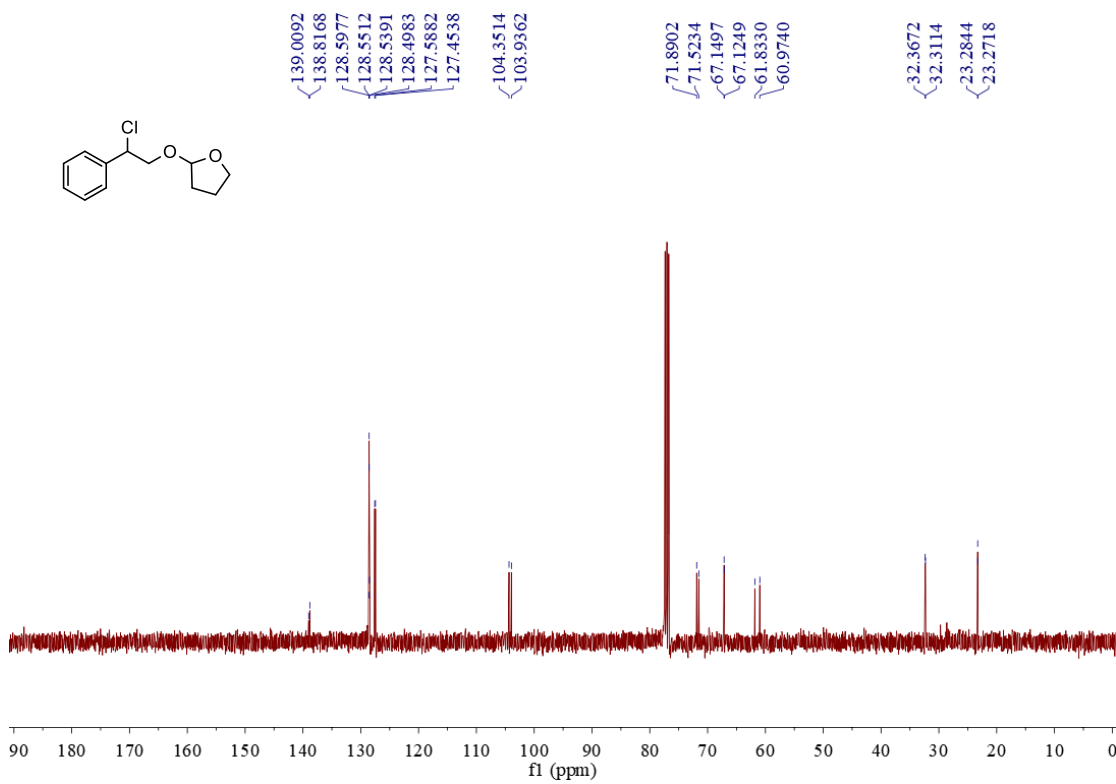

Supplement: d6cc01245k1.pdf [file d6cc01245k1.pdf]
